# Supplementary material for: Revisiting Biginelli-like reactions: solvent effects, mechanisms, biological applications and correction of several literature reports
Source: Royal Society of Chemistry journal article supplement (doi:10.1039/d4ob00272e), 2024-01-01
Supplement: d4ob00272e1.pdf [file d4ob00272e1.pdf]

*Supporting Information for*

**Revisiting Biginelli-like Reactions: Solvent Effects, Mechanisms, Biological  
Applications and Correction of Several Literature Reports**

Pedro S. Beck,<sup>a</sup> Arthur G. Leitão,<sup>a</sup> Yasmin B. Santana,<sup>a</sup> José R. Correa,<sup>a</sup> Carime V. S. Rodrigues,<sup>a</sup> Daniel  
F. S. Machado,<sup>a</sup> Guilherme D. R. Matos,<sup>a</sup> Luciana M. Ramos,<sup>b</sup> Claudia C. Gatto,<sup>a</sup> Sarah C. C. Oliveira,<sup>a</sup>  
Carlos K. Z. Andrade,<sup>a</sup> and Brenno A. D. Neto,<sup>\*a</sup>

<sup>a</sup> University of Brasilia, Chemistry Institute, Laboratory of Medicinal and Technological Chemistry.  
Campus Universitário Darcy Ribeiro, Brasília, DF, 70910-900, Brazil. E-mail: brenno.ipi@gmail.com.

<sup>b</sup> Universidade Estadual de Goiás (UEG), Anápolis, Goiás, 75001-970, Brazil.

<sup>c</sup> University of Brasilia, Institute of Biology, Laboratory of Allelopathy, Campus Universitário Darcy  
Ribeiro, Brasília, DF, 70910-900, Brazil.

## Table of Content

|                                        |    |
|----------------------------------------|----|
| List of Schemes .....                  | 3  |
| List of Tables .....                   | 4  |
| List of Figures.....                   | 5  |
| Schemes .....                          | 8  |
| Tables.....                            | 9  |
| Figures .....                          | 18 |
| Determination of numerical values..... | 48 |
| References .....                       | 49 |

## List of Schemes

|                                                                                                                                                                 |   |
|-----------------------------------------------------------------------------------------------------------------------------------------------------------------|---|
| <b>Scheme S1.</b> Synthesis reaction for the claimed structure of <b>CPD-01</b> utilizing the superacid imidazolium-based ionic liquid MSI <sub>3</sub> PW..... | 8 |
| <b>Scheme S2.</b> Synthesis of the claimed <b>CPD</b> adducts and their respective yields based on their theoretical masses.....                                | 8 |

## List of Tables

|                                                                                                                                                                                                                                                                                                                                       |    |
|---------------------------------------------------------------------------------------------------------------------------------------------------------------------------------------------------------------------------------------------------------------------------------------------------------------------------------------|----|
| <b>Table S1.</b> Kamlet-Taft descriptors, yields for the claimed <b>CPD</b> as a function of solvent variation and reagents' proportions, and E-factors.....                                                                                                                                                                          | 9  |
| <b>Table S2.</b> Melting point (mp) evaluation for the claimed <b>CPD-01</b> structure reported in the literature.....                                                                                                                                                                                                                | 10 |
| <b>Table S3.</b> A comparative assessment of experimental versus theoretical elemental analysis (CHN) data for alleged <b>CPDs</b> structures. Specifically, for claimed <b>CPD-01</b> , the data reveals a composition wherein approximately two molecules of <b>DC-01</b> correlate with nearly one molecule of urea/thiourea. .... | 11 |
| <b>Table S4.</b> Indicative of whether these articles provide descriptions and/or FTIR spectra for the claimed <b>CPD-01</b> .....                                                                                                                                                                                                    | 12 |
| <b>Table S5.</b> Indicative of whether these articles provide descriptions and/or mass spectra for claimed <b>CPD-01</b> .....                                                                                                                                                                                                        | 13 |
| <b>Table S6.</b> Indicative of whether these articles provide descriptions and/or <sup>1</sup> H and <sup>13</sup> C NMR spectra for claimed <b>CPD-01</b> . ....                                                                                                                                                                     | 14 |
| <b>Table S7.</b> Indicative of whether these articles show descriptions for elemental analysis and accuracy with respect to the expected values for the claimed <b>CPD-01</b> structure.....                                                                                                                                          | 15 |
| <b>Table S8.</b> Exploring reaction condition variations in the attempt to synthesize <b>PCC-01</b> . <sup>a</sup> .....                                                                                                                                                                                                              | 16 |
| <b>Table S9.</b> Kamlet-Taft parameters used for solvent effect analysis.....                                                                                                                                                                                                                                                         | 17 |

## List of Figures

|                                                                                                                                                                                                                                                                                                                                                                                                                                                                                                                                                                                                                                                                                                         |    |
|---------------------------------------------------------------------------------------------------------------------------------------------------------------------------------------------------------------------------------------------------------------------------------------------------------------------------------------------------------------------------------------------------------------------------------------------------------------------------------------------------------------------------------------------------------------------------------------------------------------------------------------------------------------------------------------------------------|----|
| <b>Figure S1.</b> Conditions optimization for the attempts to synthesize <b>CPD-01</b> . (Left) Temperature optimization. (Center) Catalyst amount optimization. (Right) Time optimization.....                                                                                                                                                                                                                                                                                                                                                                                                                                                                                                         | 18 |
| <b>Figure S2.</b> Correlations of reaction productivity (expressed as $\ln(P)$ ) as a function of Kamlet-Taft parameters ( $\alpha$ , $\beta$ and $\pi^*$ ). All data refer to isolated yields of the model reaction (benzaldehyde, 4-hydroxycoumarin, and urea mixtures, 5 mol% of the catalyst at 80 °C for 60 min). Reactions proportion (mmol) from top to bottom: (i) Equimolar conditions i.e. 1.00 (benzaldehyde) : 1.00 (coumarin) : 1.00 (urea). (ii) Aldehyde excess i.e. 2.00 (benzaldehyde) : 1.00 (coumarin) : 1.00 (urea). (iii) Coumarin excess i.e. 1.00 (benzaldehyde) : 2.00 (coumarin) : 1.00 (urea). (iv) Urea excess i.e. 1.00 (benzaldehyde) : 1.00 (coumarin) : 2.00 (urea)..... | 18 |
| <b>Figure S3.</b> (A) $^1\text{H}$ NRM (DMSO- $d_6$ , 300 MHz) for claimed <b>CPD-01</b> adduct. (B) $^{13}\text{C}$ NRM (DMSO- $d_6$ , 75 MHz) for claimed <b>CPD-01</b> adduct. These two spectra are contaminated with urea. ....                                                                                                                                                                                                                                                                                                                                                                                                                                                                    | 19 |
| <b>Figure S4.</b> Reaction monitoring by HRMS using <i>p</i> -cymene as the solvent and at 80 °C. ....                                                                                                                                                                                                                                                                                                                                                                                                                                                                                                                                                                                                  | 20 |
| <b>Figure S5.</b> Reaction monitoring by HRMS using limonene as the solvent and at 80 °C. ....                                                                                                                                                                                                                                                                                                                                                                                                                                                                                                                                                                                                          | 21 |
| <b>Figure S6.</b> Reaction monitoring by HRMS using water as the solvent and at 80 °C. ....                                                                                                                                                                                                                                                                                                                                                                                                                                                                                                                                                                                                             | 22 |
| <b>Figure S7.</b> Reaction monitoring by HRMS using water as the solvent and at 100 °C. 4-Aminocoumarin was used instead of 4-hydroxycoumarin.....                                                                                                                                                                                                                                                                                                                                                                                                                                                                                                                                                      | 23 |
| <b>Figure S8.</b> Wheat coleoptile bioassay testing the synthesized <b>DC</b> derivatives contaminated with urea or thiourea (proportion of $\approx 2$ <b>DC</b> : 1 urea/thiourea). Logran                                                                                                                                                                                                                                                                                                                                                                                                                                                                                                            |    |

is the positive control. **CDPs 01, 03, 05, 07** and **08** are indeed and respectively **DCs 01, 02, 03, 04** and **05** contaminated with urea. **CPDs 02, 04** and **06** are respectively **DCs 01, 02, 03**, contaminated with thiourea.....24

**Figure S9.** Cellular division (mitosis) inhibition by **DC-03** contaminated with urea (proportion of  $\approx 2$  **DC** : 1 urea/thiourea). (A) Nuclei stained with the commercially available DAPI (blue emitter). (B) Anti- $\alpha$ -Tubulin monoclonal antibody (commercially available red emitter). (C) Merged images from (A)-(B). Remarkably, despite the presence of those contaminant, **DC-03** induced monoastral spindles in mitotic cells. ....25

**Figure S10.** (A)  $^1\text{H}$  NMR spectrum (600 MHz,  $\text{DMSO-}d_6$ ) of **DC-01**. (B)  $^{13}\text{C}\{^1\text{H}\}$  NMR spectrum (150 MHz,  $\text{DMSO-}d_6$ ) of **DC-01**.....26

**Figure S11.** 2D COSY NMR (600 MHz,  $\text{DMSO-}d_6$ ) for **DC-01**.....27

**Figure S12.** 2D HSQC NMR (600 MHz and 150 MHz,  $\text{DMSO-}d_6$ ) for **DC-01**. ....28

**Figure S13.** 2D HMBC (600 MHz and 150 MHz,  $\text{DMSO-}d_6$ ) for **DC-01**. ....29

**Figure S14.** (A)  $^1\text{H}$  NMR spectrum (600 MHz,  $\text{DMSO-}d_6$ ) of **DC-02**. (B)  $^{13}\text{C}\{^1\text{H}\}$  NMR spectrum (150 MHz,  $\text{DMSO-}d_6$ ) of **DC-02**.....30

**Figure S15.** (A)  $^1\text{H}$  NMR spectrum (600 MHz,  $\text{DMSO-}d_6$ ) of **DC-03**. (B)  $^{13}\text{C}$  NMR spectrum (150 MHz,  $\text{DMSO-}d_6$ ) of **DC-03**.....31

**Figure S16.** (A)  $^1\text{H}$  NMR spectrum (600 MHz,  $\text{DMSO-}d_6$ ) of **DC-04**. (B)  $^{13}\text{C}\{^1\text{H}\}$  NMR spectrum (150 MHz,  $\text{DMSO-}d_6$ ) of **DC-04**.....32

**Figure S17.** (A)  $^1\text{H}$  NMR spectrum (600 MHz,  $\text{DMSO-}d_6$ ) of **DC-05**. (B)  $^{13}\text{C}\{^1\text{H}\}$  NMR spectrum (150 MHz,  $\text{DMSO-}d_6$ ) of **DC-05**.....33

**Figure S18.** (A)  $^1\text{H}$  NMR spectrum (600 MHz,  $\text{DMSO-}d_6$ ) of **APC-01**. (B)  $^{13}\text{C}\{^1\text{H}\}$  NMR spectrum (150 MHz,  $\text{DMSO-}d_6$ ) of **APC-01**. ....34

|                                                                                                                                                                                                                                   |    |
|-----------------------------------------------------------------------------------------------------------------------------------------------------------------------------------------------------------------------------------|----|
| <b>Figure S19.</b> (A) <sup>1</sup> H NMR spectrum (600 MHz, CDCl <sub>3</sub> ) of <b>TCC-01</b> . (B) <sup>13</sup> C{ <sup>1</sup> H} NMR spectrum (150 MHz, CDCl <sub>3</sub> ) of <b>TCC-01</b> . .....                      | 35 |
| <b>Figure S20.</b> (A) <sup>1</sup> H NMR spectrum (600 MHz, DMSO- <i>d</i> <sub>6</sub> ) of 4-aminocoumarin. (B) <sup>13</sup> C{ <sup>1</sup> H} NMR spectrum (150 MHz, DMSO- <i>d</i> <sub>6</sub> ) of 4-aminocoumarin. .... | 36 |
| <b>Figure S21.</b> FTIR (KBr) spectrum for <b>DC-01</b> . .....                                                                                                                                                                   | 37 |
| <b>Figure S22.</b> FTIR (KBr) spectrum for <b>DC-02</b> . .....                                                                                                                                                                   | 37 |
| <b>Figure S23.</b> FTIR (KBr) spectrum for <b>DC-03</b> . .....                                                                                                                                                                   | 38 |
| <b>Figure S24.</b> FTIR (KBr) spectrum for <b>DC-04</b> . .....                                                                                                                                                                   | 38 |
| <b>Figure S25.</b> FTIR (KBr) spectrum for <b>DC-05</b> . .....                                                                                                                                                                   | 39 |
| <b>Figure S26.</b> FTIR (KBr) spectrum for 4-aminocoumarin. ....                                                                                                                                                                  | 39 |
| <b>Figure S27.</b> FTIR (KBr) spectrum for <b>APC-01</b> . ....                                                                                                                                                                   | 40 |
| <b>Figure S28.</b> FTIR (KBr) spectrum for <b>TCC-01</b> . ....                                                                                                                                                                   | 40 |
| <b>Figure S29.</b> (A) ESI(+)-MS for <b>DC-01</b> . (B) ESI(+)-MS/MS for <b>DC-01</b> . ....                                                                                                                                      | 41 |
| <b>Figure S30.</b> (A) ESI(+)-MS for <b>DC-02</b> . (B) ESI(+)-MS/MS for <b>DC-02</b> . ....                                                                                                                                      | 42 |
| <b>Figure S31.</b> (A) ESI(+)-MS for <b>DC-03</b> . (B) ESI(+)-MS/MS for <b>DC-03</b> . ....                                                                                                                                      | 43 |
| <b>Figure S32.</b> (A) ESI(+)-MS for <b>DC-04</b> . (B) ESI(+)-MS/MS for <b>DC-04</b> . ....                                                                                                                                      | 44 |
| <b>Figure S33.</b> (A) ESI(+)-MS for <b>DC-05</b> . (B) ESI(+)-MS/MS for <b>DC-05</b> . ....                                                                                                                                      | 45 |
| <b>Figure S34.</b> (A) ESI(+)-MS for <b>APC-01</b> . (B) ESI(+)-MS/MS for <b>APC-01</b> . ....                                                                                                                                    | 46 |
| <b>Figure S35.</b> (A) ESI(+)-MS for <b>TCC-01</b> . (B) ESI(+)-MS/MS for <b>TCC-01</b> . ....                                                                                                                                    | 47 |

## Schemes

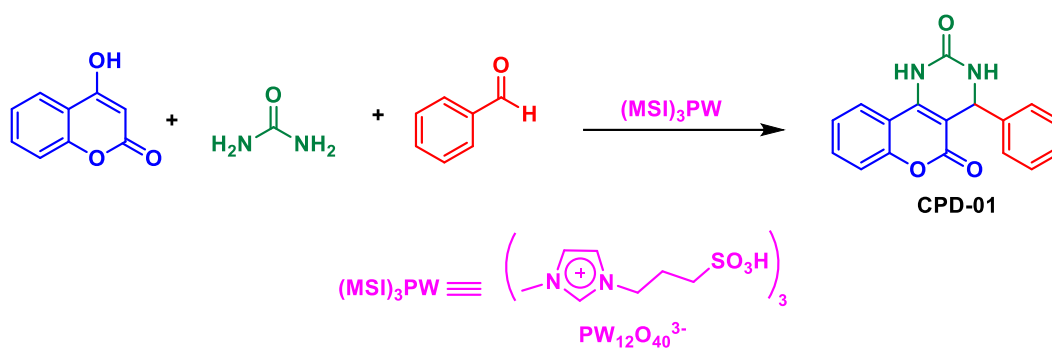

**Scheme S1.** Synthesis reaction for the claimed structure of **CPD-01** utilizing the superacidic imidazolium-based ionic liquid  $MSI_3PW$ .

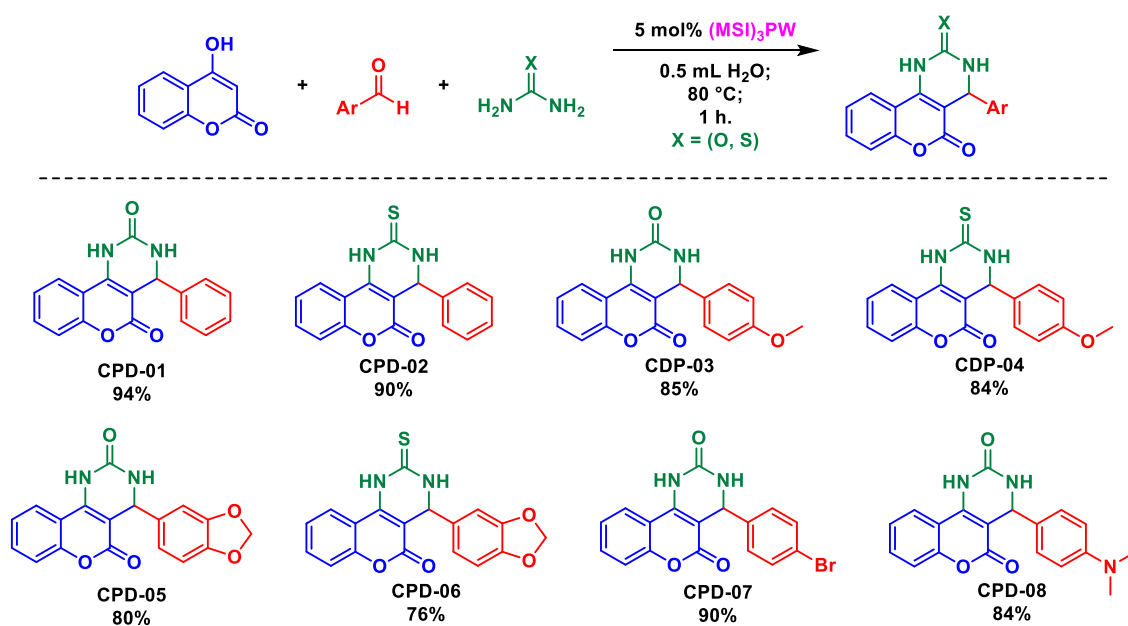

**Scheme S2.** Synthesis of the claimed **CPD** adducts and their respective yields based on their theoretical masses.



## Tables

**Table S1.** Kamlet-Taft descriptors, yields for the claimed **CPD** as a function of solvent variation and reagents' proportions, and E-factors.

Oc1ccc2c(c1)c(=O)oc2 + NC(=O)N + O=Cc1ccccc1 >> [MSI]3PW, Solvent
  
**CPD-01**

$(MSI)_3PW \equiv \left( \text{N}^+ \text{C}_4\text{H}_4\text{CH}_3 \text{C}_3\text{H}_7\text{SO}_3\text{H} \right)_3 \text{PW}_{12}\text{O}_{40}^{3-}$

| Isolated yields (%)                                   |                         |       |       |       |       |                       |
|-------------------------------------------------------|-------------------------|-------|-------|-------|-------|-----------------------|
| Reagents' proportion (mmol)                           |                         |       |       |       |       |                       |
| Coumarin : Aldehyde : Urea                            |                         |       |       |       |       |                       |
| Solvent                                               | Kamlet-Taft descriptors | 1:1:1 | 2:1:1 | 1:2:1 | 1:1:2 | E factor <sup>†</sup> |
| AcOEt                                                 | $\alpha$ 0.00           |       |       |       |       |                       |
|                                                       | $\beta$ 0.45            | 74%   | 67%   | 72%   | 62%   | 47                    |
|                                                       | $\pi^*$ 0.55            |       |       |       |       |                       |
| MeCN                                                  | $\alpha$ 0.19           |       |       |       |       |                       |
|                                                       | $\beta$ 0.31            | 63%   | 85%   | 65%   | 53%   | 41                    |
|                                                       | $\pi^*$ 0.75            |       |       |       |       |                       |
| Water                                                 | $\alpha$ 1.17           |       |       |       |       |                       |
|                                                       | $\beta$ 0.47            | 94%   | 94%   | 90%   | 71%   | 36                    |
|                                                       | $\pi^*$ 1.09            |       |       |       |       |                       |
| [C <sub>4</sub> C <sub>1</sub> Im][BF <sub>4</sub> ]  | $\alpha$ 0.63           |       |       |       |       |                       |
|                                                       | $\beta$ 0.38            | 69%   | 93%   | 83%   | 77%   | 38                    |
|                                                       | $\pi^*$ 1.04            |       |       |       |       |                       |
| [C <sub>4</sub> C <sub>1</sub> Im][NTf <sub>2</sub> ] | $\alpha$ 0.62           |       |       |       |       |                       |
|                                                       | $\beta$ 0.23            | 80%   | 90%   | 88%   | 59%   | 39                    |
|                                                       | $\pi^*$ 0.90            |       |       |       |       |                       |
| [C <sub>4</sub> C <sub>1</sub> Im][PF <sub>6</sub> ]  | $\alpha$ 0.63           |       |       |       |       |                       |
|                                                       | $\beta$ 0.19            | 71%   | 94%   | 75%   | 64%   | 37                    |
|                                                       | $\pi^*$ 1.02            |       |       |       |       |                       |
| CH <sub>2</sub> Cl <sub>2</sub>                       | $\alpha$ 0.04           |       |       |       |       |                       |
|                                                       | $\beta$ -0.01           | 74%   | 79%   | 80%   | 75%   | 44                    |
|                                                       | $\pi^*$ 0.79            |       |       |       |       |                       |
| EtOH                                                  | $\alpha$ 0.83           |       |       |       |       |                       |
|                                                       | $\beta$ 0.75            | 77%   | 90%   | 75%   | 58%   | 39                    |
|                                                       | $\pi^*$ 0.51            |       |       |       |       |                       |
| Hexane                                                | $\alpha$ -0.08          |       |       |       |       |                       |
|                                                       | $\beta$ 0.00            | 53%   | 63%   | 59%   | 44%   | 55                    |
|                                                       | $\pi^*$ 0.00            |       |       |       |       |                       |
| MeOH                                                  | $\alpha$ 0.93           |       |       |       |       |                       |
|                                                       | $\beta$ 0.66            | 65%   | 92%   | 82%   | 52%   | 38                    |
|                                                       | $\pi^*$ 0.58            |       |       |       |       |                       |
| PhMe                                                  | $\alpha$ 0.00           |       |       |       |       |                       |
|                                                       | $\beta$ 0.11            | 55%   | 72%   | 75%   | 50%   | 47                    |
|                                                       | $\pi^*$ 0.54            |       |       |       |       |                       |

<sup>†</sup> Calculated for the best yield of each solvent.

**Table S2.** Melting point (mp) evaluation for the claimed **CPD-01** structure reported in the literature.

| <b>Year of publication</b> | <b>mp (°C)</b> | <b>Reference</b> |
|----------------------------|----------------|------------------|
| 2003                       | -              | 1                |
| 2006                       | 162            | 2                |
| 2008                       | 162-163        | 3                |
| 2014                       | 210-212        | 4                |
| 2015                       | 265-267        | 5                |
| 2016                       | 162-163        | 6                |
| 2016                       | 160-162        | 7                |
| 2017                       | 160-162        | 8                |
| 2018                       | 160-162        | 9                |
| 2018                       | 160-162        | 10               |
| 2018                       | 206            | 11               |
| 2018                       | 160-162        | 12               |
| 2018                       | 238-240        | 13               |
| 2019                       | 165-167        | 14               |
| 2019                       | 160-162        | 15               |
| 2020                       | 163-165        | 16               |
| 2020                       | 211-213        | 17               |
| 2020                       | 160-162        | 18               |
| 2022                       | 162-163        | 19               |
| 2022                       | 160-162        | 20               |
| 2023                       | 214-216        | 21               |
| 2023                       | 210-212        | 22               |

**Table S3.** A comparative assessment of experimental versus theoretical elemental analysis (CHN) data for alleged **CPDs** structures. Specifically, for claimed **CPD-01**, the data reveals a composition wherein approximately two molecules of **DC-01** correlate with nearly one molecule of urea/thiourea.

| Structure     | Experimental Data |              |              | Theoretical Data |              |              |
|---------------|-------------------|--------------|--------------|------------------|--------------|--------------|
|               | Carbon (%)        | Hydrogen (%) | Nitrogen (%) | Carbon (%)       | Hydrogen (%) | Nitrogen (%) |
| <b>CPD-01</b> | 64.62             | 3.92         | 2.90         | 69.86            | 4.14         | 9.58         |
| <b>CPD-02</b> | 63.59             | 3.47         | 0.48         | 66.22            | 3.92         | 9.08         |
| <b>CPD-03</b> | 68.65             | 3.95         | 0.13         | 67.08            | 4.38         | 8.69         |
| <b>CPD-04</b> | 53.33             | 2.85         | 0.06         | 63.89            | 4.17         | 8.28         |
| <b>CPD-05</b> | 67.29             | 3.36         | 0.07         | 64.29            | 3.6          | 8.33         |
| <b>CPD-06</b> | 64.04             | 3.25         | 0.01         | 61.36            | 3.43         | 7.95         |
| <b>CPD-07</b> | 56.01             | 2.82         | 1.32         | 55.01            | 2.99         | 7.55         |
| <b>CPD-08</b> | 70.53             | 4.49         | 2.98         | 68.05            | 5.11         | 12.53        |

**Table S4.** Indicative of whether these articles provide descriptions and/or FTIR spectra for the claimed CPD-01.

| <b>Year of publication</b> | <b>Experimental description</b> | <b>Available Spectrum</b> | <b>Reference</b> |
|----------------------------|---------------------------------|---------------------------|------------------|
| 2003                       | -                               | -                         | 1                |
| 2006                       | Yes                             | No                        | 2                |
| 2008                       | Yes                             | No                        | 3                |
| 2014                       | Yes                             | No                        | 4                |
| 2015                       | Yes                             | No                        | 5                |
| 2016                       | Yes                             | No                        | 6                |
| 2016                       | Yes                             | No                        | 7                |
| 2017                       | Yes                             | No                        | 8                |
| 2018                       | Yes                             | No                        | 9                |
| 2018                       | No                              | No                        | 10               |
| 2018                       | Yes                             | No                        | 11               |
| 2018                       | No                              | No                        | 12               |
| 2018                       | Yes                             | Yes                       | 13               |
| 2019                       | No                              | No                        | 14               |
| 2019                       | Yes                             | No                        | 15               |
| 2020                       | Yes                             | No                        | 16               |
| 2020                       | No                              | Yes                       | 17               |
| 2020                       | Yes                             | No                        | 18               |
| 2022                       | Yes                             | No                        | 19               |
| 2022                       | Yes                             | Yes                       | 20               |
| 2023                       | Yes                             | Yes                       | 21               |
| 2023                       | No                              | No                        | 22               |

**Table S5.** Indicative of whether these articles provide descriptions and/or mass spectra for claimed CPD-01.

| Year of publication | Experimental Description | Ionization Source / ( <i>m/z</i> detected) | Available Spectrum | Reference |
|---------------------|--------------------------|--------------------------------------------|--------------------|-----------|
| 2003                | -                        |                                            | -                  | 1         |
| 2006                | No                       |                                            | No                 | 2         |
| 2008                | Yes                      | Not available / (292.0)                    | No                 | 3         |
| 2014                | No                       |                                            | No                 | 4         |
| 2015                | No                       |                                            | No                 | 5         |
| 2016                | No                       |                                            | No                 | 6         |
| 2016                | Yes                      | ESI-(+) / (292.3)                          | No                 | 7         |
| 2017                | No                       |                                            | No                 | 8         |
| 2018                | No                       |                                            | No                 | 9         |
| 2018                | Yes                      | ESI-(+) / (292.3)                          | Yes                | 10        |
| 2018                | No                       |                                            | No                 | 11        |
| 2018                | Yes                      | ESI-(+) / (292.3)                          | Yes                | 12        |
| 2018                | Yes                      | Not available / (292)                      | No                 | 13        |
| 2019                | No                       |                                            | No                 | 14        |
| 2019                | Yes                      | ESI-(+) / (292.3)                          | Yes                | 15        |
| 2020                | Yes                      | ESI-(+) / (293.3)                          | No                 | 16        |
| 2020                | No                       |                                            | No                 | 17        |
| 2020                | No                       |                                            | No                 | 18        |
| 2022                | Yes                      | Not available / (292.0)                    | No                 | 19        |
| 2022                | No                       |                                            | No                 | 20        |
| 2023                | No                       |                                            | No                 | 21        |
| 2023                | No                       | No                                         | No                 | 22        |

**Table S6.** Indicative of whether these articles provide descriptions and/or <sup>1</sup>H and <sup>13</sup>C NMR spectra for claimed **CPD-01**.

| Year   | <sup>1</sup> H NMR       |                    | <sup>13</sup> C NMR      |                    | Reference |
|--------|--------------------------|--------------------|--------------------------|--------------------|-----------|
|        | Experimental Description | Available spectrum | Experimental Description | Available spectrum |           |
| 2003   | -                        | -                  | -                        | -                  | 1         |
| 2006   | Yes                      | No                 | No                       | No                 | 2         |
| 2008   | Yes                      | No                 | No                       | No                 | 3         |
| 2014   | Yes                      | No                 | Yes                      | No                 | 4         |
| 2015   | Yes                      | No                 | Yes                      | No                 | 5         |
| 2016   | Yes                      | No                 | No                       | No                 | 6         |
| 2016   | Yes                      | Yes*               | Yes                      | Yes                | 7         |
| 2017   | Yes                      | No                 | No                       | No                 | 8         |
| 2018   | Yes                      | No                 | Yes                      | No                 | 9         |
| 2018   | Yes                      | Yes*               | Yes                      | Yes*               | 10        |
| 2018   | Yes                      | No                 | Yes                      | No                 | 11        |
| 2018   | Yes                      | Yes*               | Yes                      | Yes*               | 12        |
| 2018   | Yes                      | Yes                | Yes                      | No                 | 13        |
| 2019   | Yes                      | Yes                | No                       | No                 | 14        |
| 2019   | Yes                      | Yes*               | Yes                      | Yes*               | 15        |
| 2020   | Yes                      | No                 | Yes                      | No                 | 16        |
| 2020   | No                       | No                 | No                       | No                 | 17        |
| 2020   | Yes                      | No                 | Yes                      | No                 | 18        |
| 2022   | Yes                      | No                 | No                       | No                 | 19        |
| 2022   | No                       | No                 | No                       | No                 | 20        |
| 2023   | Yes                      | Yes                | No                       | No                 | 21        |
| 2023** | No                       | No                 | No                       | No                 | 22        |

\* Indicate the articles that likely have duplicate spectra among themselves. \*\* Available spectra for similar structures, but not for **CPD-01**.

**Table S7.** Indicative of whether these articles show descriptions for elemental analysis and accuracy with respect to the expected values for the claimed **CPD-01** structure.

| Year of publication | Experimental Description | Accuracy | Calculate (%)               | Found (%)                   | Reference |
|---------------------|--------------------------|----------|-----------------------------|-----------------------------|-----------|
| 2003                | -                        | -        | -                           | -                           | 1         |
| 2006                | Yes                      | Yes      | C 69.88<br>H 4.10<br>N 9.58 | C 69.80<br>H 4.01<br>N 9.49 | 2         |
| 2008                | Yes                      | Yes      | C 69.86<br>H 4.10<br>N 9.58 | C 69.85<br>H 4.14<br>N 9.56 | 3         |
| 2014                | No                       | -        | -                           | -                           | 4         |
| 2015                | Yes                      | Yes      | C 69.86<br>H 4.14<br>N 9.58 | C 69.67<br>H 4.11<br>N 9.61 | 5         |
| 2016                | Yes                      | No*(a)   | C 69.86<br>H 4.14<br>N 9.58 | C 69.64<br>H 3.96<br>N 9.69 | 6         |
| 2016                | No                       | -        | -                           | -                           | 7         |
| 2017                | No                       | -        | -                           | -                           | 8         |
| 2017                | No                       | -        | -                           | -                           | 9         |
| 2018                | Yes                      | Yes      | C 69.86<br>H 4.14<br>N 9.58 | C 70.02<br>H 4.18<br>N 9.69 | 10        |
| 2018                | No                       | -        | -                           | -                           | 11        |
| 2018                | Yes                      | Yes      | C 69.86<br>H 4.14<br>N 9.58 | C 70.02<br>H 4.18<br>N 9.69 | 12        |
| 2018                | Yes                      | Yes      | C 69.86<br>H 4.14<br>N 9.58 | C 70.00<br>H 4.27<br>N 9.60 | 13        |
| 2019                | No                       | -        | -                           | -                           | 14        |
| 2019                | Yes                      | Yes      | C 69.86<br>H 4.14<br>N 9.58 | C 70.02<br>H 4.18<br>N 9.69 | 15        |
| 2020                | Yes                      | Yes      | Not available               | C 69.86<br>H 4.14<br>N 9.58 | 16        |
| 2020                | No                       | -        | -                           | -                           | 17        |
| 2020                | Yes                      | Yes      | C 69.86<br>H 4.14<br>N 9.58 | C 69.92<br>H 4.22<br>N 9.70 | 18        |
| 2022                | Yes                      | No*(b)   | C 69.86<br>H 4.10<br>N 9.58 | C 69.85<br>H 4.14<br>N 5.30 | 19        |
| 2022                | No                       | -        | -                           | -                           | 20        |
| 2023                | No                       | -        | -                           | -                           | 21        |
| 2023                | No                       | -        | -                           | -                           | 22        |

\* = Chemical formula calculated based on experimental CHN: (a) C<sub>17</sub>H<sub>11</sub>N<sub>2</sub>O<sub>3</sub>; (b) C<sub>31</sub>H<sub>22</sub>N<sub>2</sub>O<sub>7</sub>. The results of elemental analyses in red highlight that the values have been triplicated in different publications. The value highlighted in blue indicates that the obtained value is exactly equal to the theoretical value.

**Table S8.** Exploring reaction condition variations in the attempt to synthesize **PCC-01**.<sup>a</sup>

| Entry | Solvent           | Temperature (°C) | Time   | Catalyst              | Product      | Yield |
|-------|-------------------|------------------|--------|-----------------------|--------------|-------|
| 1     | Ethanol           | 50               | 30 min | HCl                   | <b>DC-01</b> | 51%   |
| 2     | Ethanol           | 60               | 30 min | HCl                   | <b>DC-01</b> | 53%   |
| 3     | Ethanol           | 70               | 30 min | HCl                   | <b>DC-01</b> | 52%   |
| 4     | Ethanol           | 80               | 30 min | HCl                   | <b>DC-01</b> | 44%   |
| 5     | Ethanol           | 90               | 30 min | HCl                   | <b>DC-01</b> | 48%   |
| 6     | Ethanol           | 100              | 30 min | HCl                   | <b>DC-01</b> | 44%   |
| 7     | Ethanol           | 60               | 2 h    | HCl                   | <b>DC-01</b> | 47%   |
| 8     | Ethanol           | 60               | 3 h    | HCl                   | <b>DC-01</b> | 44%   |
| 9     | Ethanol           | 60               | 4 h    | HCl                   | <b>DC-01</b> | 44%   |
| 10    | Ethanol           | 60               | 5 h    | HCl                   | <b>DC-01</b> | 45%   |
| 11    | Ethanol           | 60               | 6 h    | HCl                   | <b>DC-01</b> | 48%   |
| 12    | Ethanol           | 70               | 6 h    | HCl                   | <b>DC-01</b> | 43%   |
| 13    | Ethanol           | 80               | 6 h    | HCl                   | <b>DC-01</b> | 42%   |
| 14    | Ethanol           | 90               | 6 h    | HCl                   | <b>DC-01</b> | 43%   |
| 15    | Ethanol           | 100              | 6 h    | HCl                   | <b>DC-01</b> | 47%   |
| 16    | Ethanol           | 60               | 24 h   | HCl                   | <b>DC-01</b> | 44%   |
| 17    | Ethanol           | 100              | 24 h   | HCl                   | <b>DC-01</b> | 38%   |
| 18    | Ethanol           | 60               | 48 h   | HCl                   | <b>DC-01</b> | 48%   |
| 19    | Ethanol           | 100              | 48 h   | HCl                   | <b>DC-01</b> | 38%   |
| 20    | Ethanol           | 60               | 30 min | (MSI) <sub>3</sub> PW | <b>DC-01</b> | 73%   |
| 21    | Ethanol           | 60               | 24 h   | (MSI) <sub>3</sub> PW | <b>DC-01</b> | 81%   |
| 22    | Ethanol           | 100              | 30 min | (MSI) <sub>3</sub> PW | <b>DC-01</b> | 55%   |
| 23    | Ethanol           | 100              | 24 h   | (MSI) <sub>3</sub> PW | <b>DC-01</b> | 88%   |
| 24    | Ethanol           | 60               | 30 min | KOtBu                 | <b>DC-01</b> | 65%   |
| 25    | Ethanol           | 60               | 24 h   | KOtBu                 | <b>DC-01</b> | 80%   |
| 26    | <i>t</i> -Butanol | 60               | 30 min | KOtBu                 | <b>DC-01</b> | 66%   |
| 27    | <i>t</i> -Butanol | 60               | 24 h   | KOtBu                 | <b>DC-01</b> | 65%   |
| 28    | Solventless       | 60               | 15 min | MWI <sup>b</sup>      | <b>DC-01</b> | 40%   |

<sup>a</sup>No condition allowed the formation of **ACP-01**. <sup>b</sup> Microwave irradiation.



**Table S9.** Kamlet-Taft parameters used for solvent effect analysis.

| Solvent                            | $\alpha$ | $\beta$ | $\pi^*$ |
|------------------------------------|----------|---------|---------|
| 1,4-Dioxane                        | 0.00     | 0.37    | 0.55    |
| Acetone                            | 0.08     | 0.43    | 0.71    |
| AcOEt                              | 0.00     | 0.45    | 0.55    |
| BMI.BF <sub>4</sub>                | 0.63     | 0.38    | 1.04    |
| BMI.NTf <sub>2</sub>               | 0.62     | 0.23    | 0.90    |
| BMI.PF <sub>6</sub>                | 0.63     | 0.38    | 1.04    |
| CF <sub>3</sub> CH <sub>2</sub> OH | 1.51     | 0.00    | 0.73    |
| CHCl <sub>2</sub>                  | 0.04     | -0.01   | 0.79    |
| CHCl <sub>3</sub>                  | 0.20     | 0.10    | 0.58    |
| Cyclohexane                        | 0.00     | 0.00    | 0.00    |
| EtOH                               | 0.83     | 0.75    | 0.51    |
| H <sub>2</sub> O                   | 1.17     | 0.47    | 1.09    |
| Hexane                             | -0.08    | 0.00    | 0.00    |
| Limonene                           | 0.00     | 0.00    | 0.16    |
| MeCN                               | 0.19     | 0.31    | 0.75    |
| MeOH                               | 0.93     | 0.66    | 0.58    |
| <i>n</i> -OcOH                     | 0.77     | 0.81    | 0.4     |
| <i>p</i> -Cymene                   | 0.00     | 0.13    | 0.39    |
| <i>t</i> -BuOH                     | 0.68     | 0.93    | 0.41    |
| THF                                | 0.00     | 0.55    | 0.58    |
| Toluene                            | 0.00     | 0.11    | 0.54    |
| Triethylamine                      | 0.00     | 0.71    | 0.14    |

## Figures

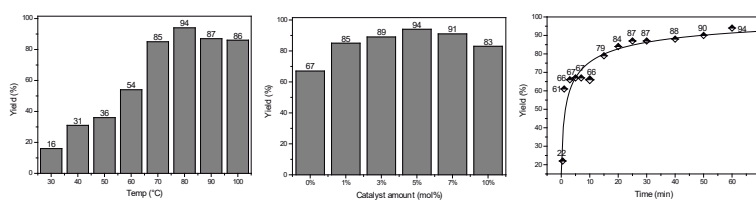

**Figure S1.** Conditions optimization for the attempts to synthesize **CPD-01**. (Left) Temperature optimization. (Center) Catalyst amount optimization. (Right) Time optimization.

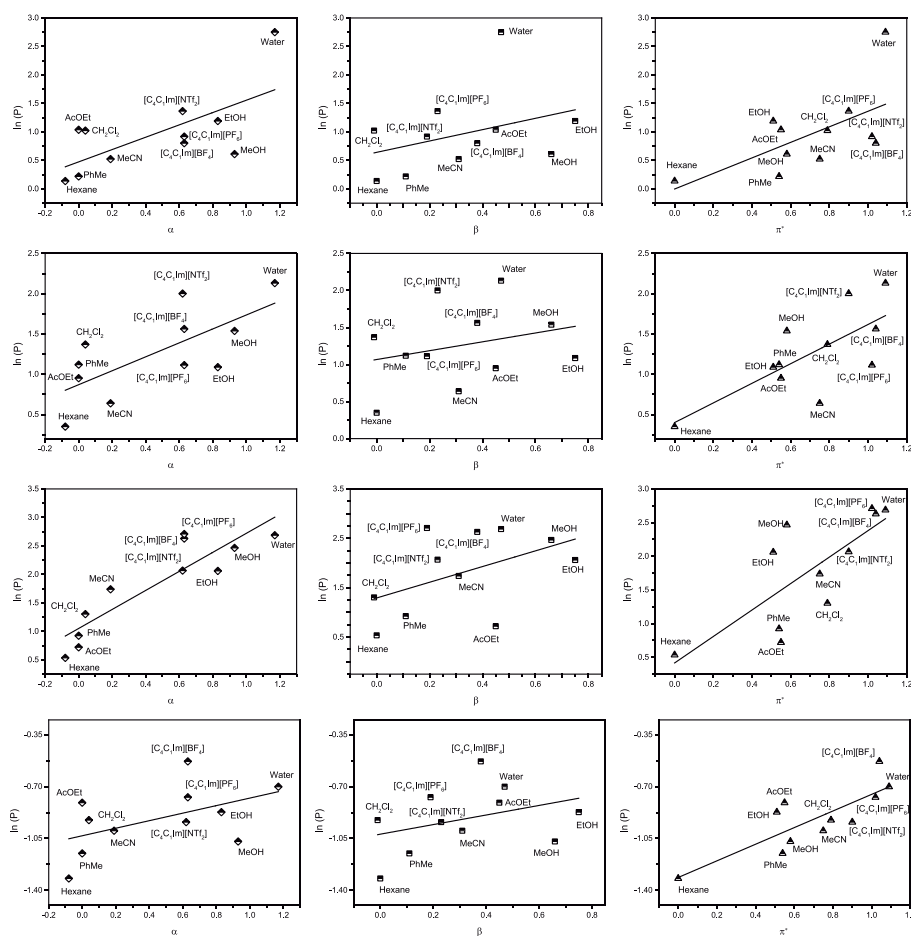

**Figure S2.** Correlations of reaction productivity (expressed as  $\ln(P)$ ) as a function of Kamlet-Taft parameters ( $\alpha$ ,  $\beta$  and  $\pi^*$ ). All data refer to isolated yields of the model reaction (benzaldehyde, 4-hydroxycoumarin, and urea mixtures, 5 mol% of the catalyst at 80 °C for 60 min). Reactions proportion (mmol) from top to bottom: (i) Equimolar conditions i.e. 1.00 (benzaldehyde) : 1.00 (coumarin) : 1.00 (urea). (ii) Aldehyde excess i.e. 2.00 (benzaldehyde) : 1.00 (coumarin) : 1.00 (urea). (iii) Coumarin excess i.e. 1.00 (benzaldehyde) : 2.00 (coumarin) : 1.00 (urea). (iv) Urea excess i.e. 1.00 (benzaldehyde) : 1.00 (coumarin) : 2.00 (urea).

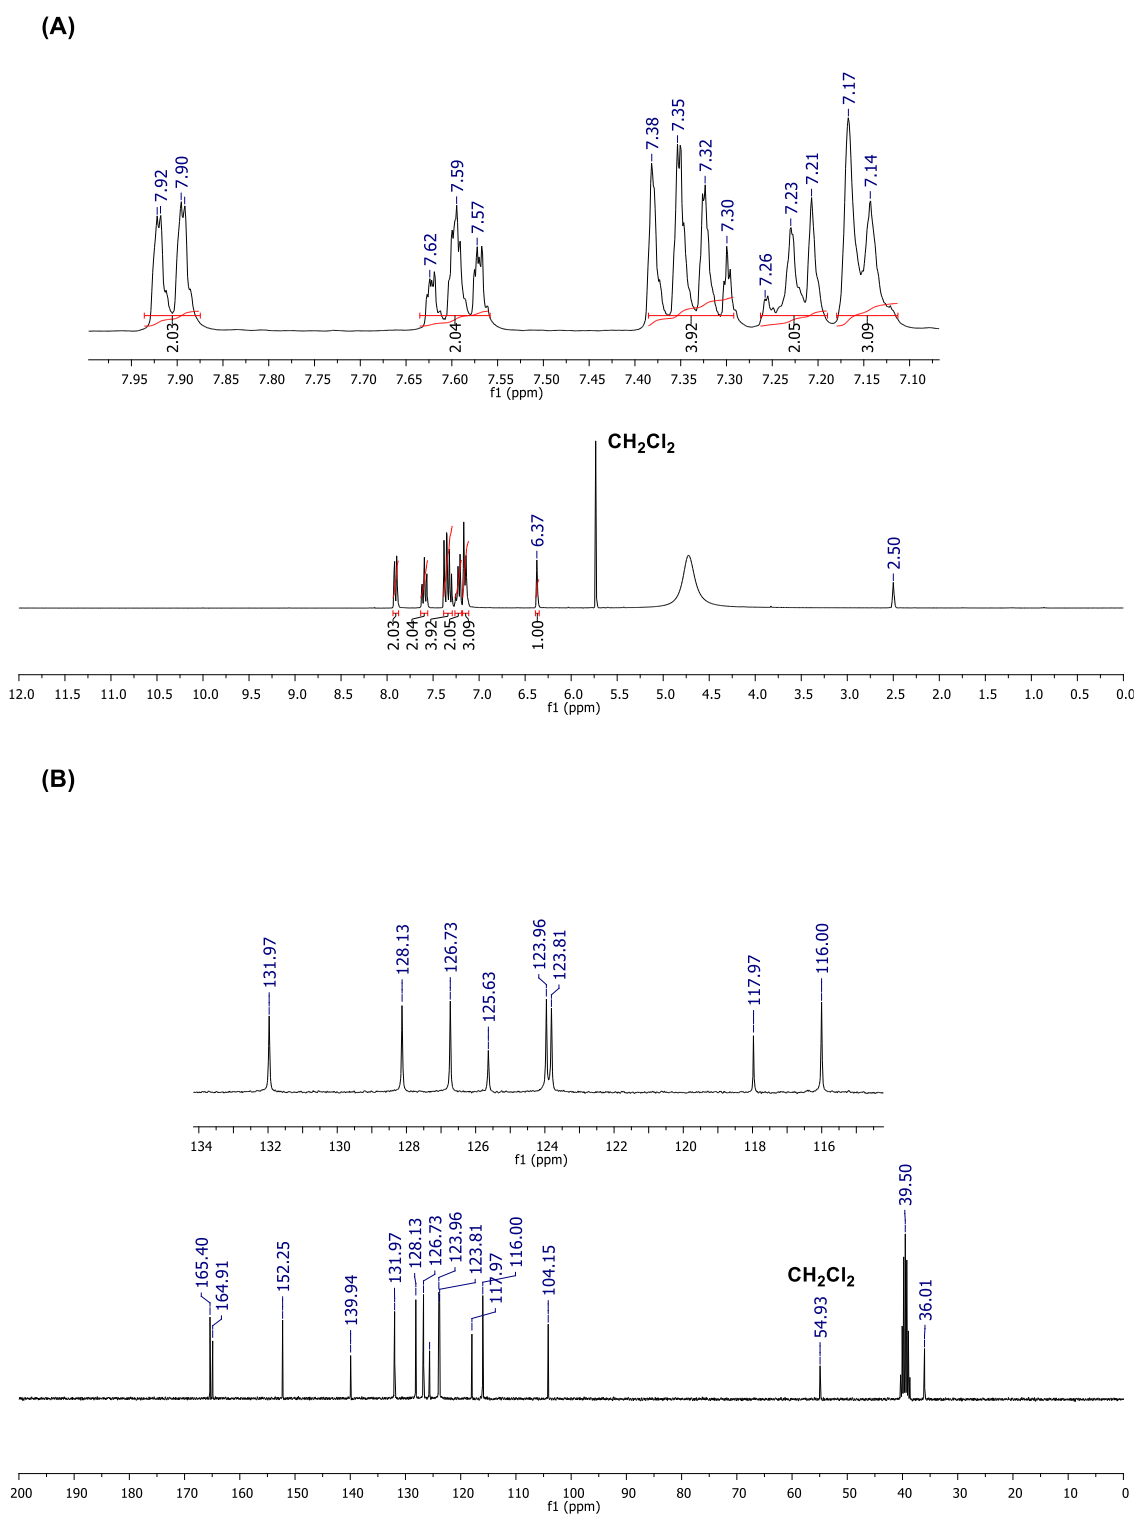

**Figure S3.** (A)  $^1\text{H}$  NRM (DMSO- $d_6$ , 300 MHz) for claimed **CPD-01** adduct. (B)  $^{13}\text{C}\{^1\text{H}\}$  NRM (DMSO- $d_6$ , 75 MHz) for claimed **CPD-01** adduct. These two spectra are contaminated with urea. Note the number of hydrogens and carbons do not fit the claimed **CPD-01** structure.

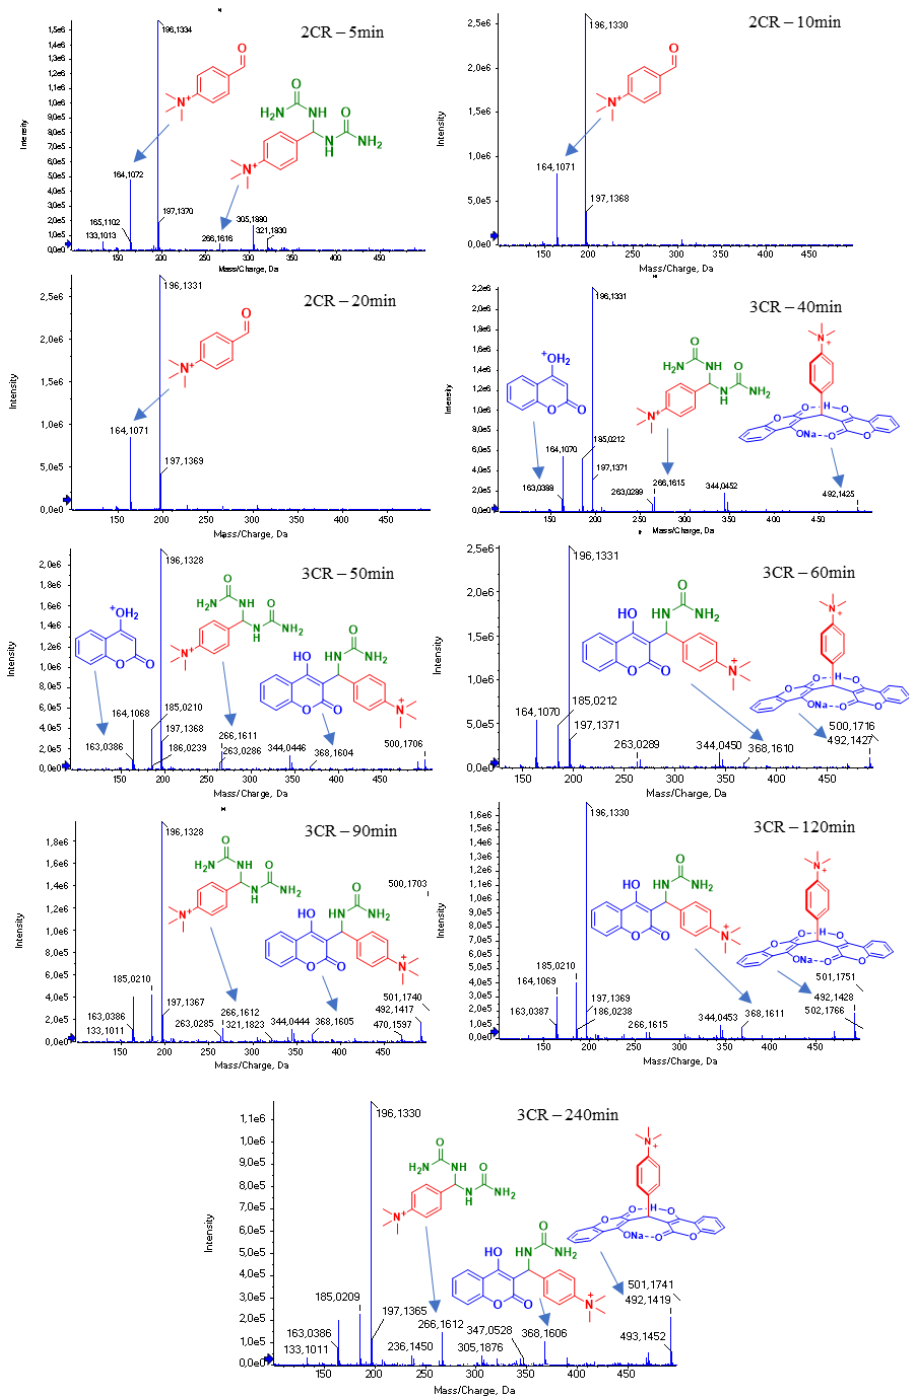

**Figure S4.** Reaction monitoring by HRMS using *p*-cymene as the solvent and at 80 °C.

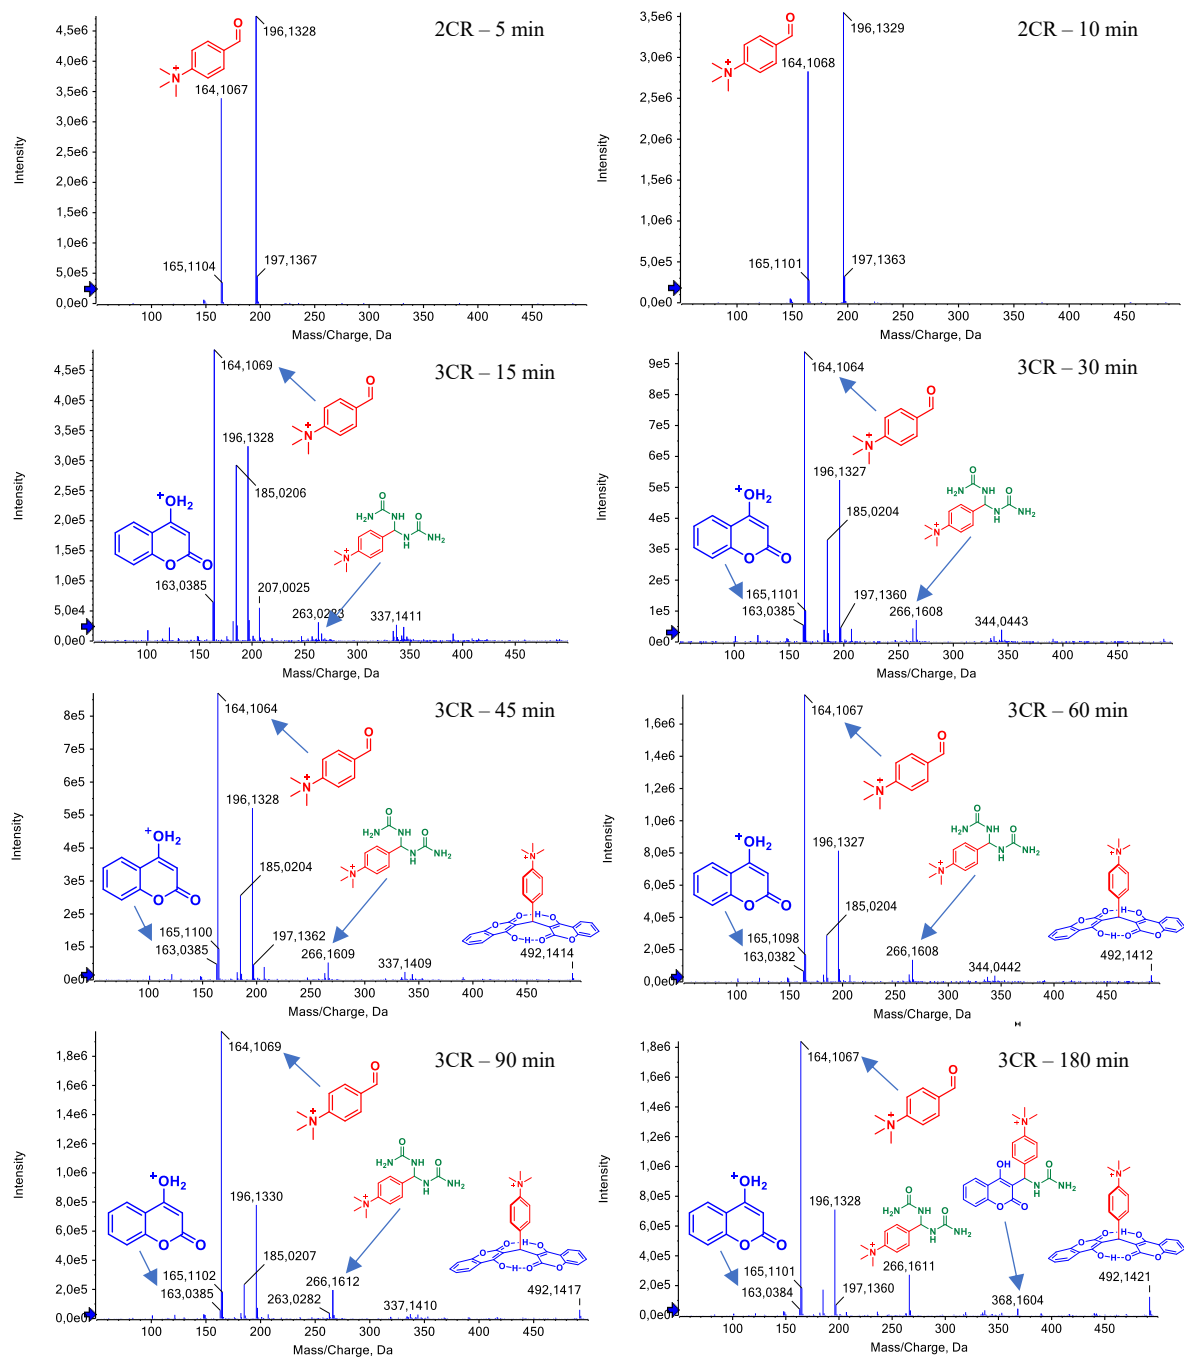

**Figure S5.** Reaction monitoring by HRMS using limonene as the solvent and at 80 °C.

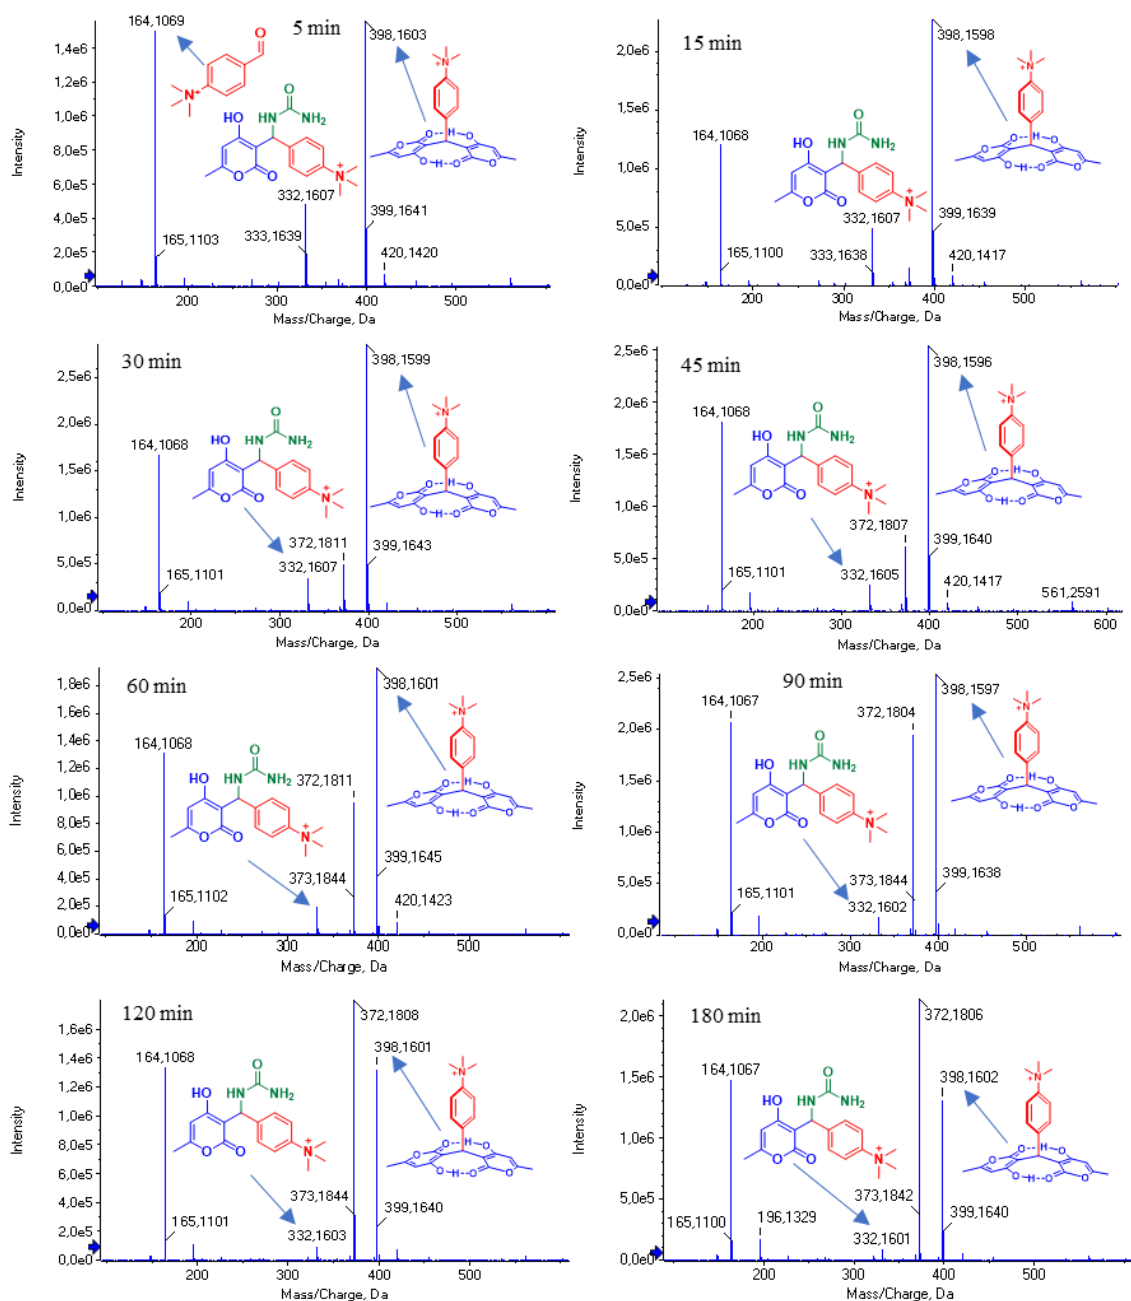

**Figure S6.** Reaction monitoring by HRMS using water as the solvent and at 80 °C.

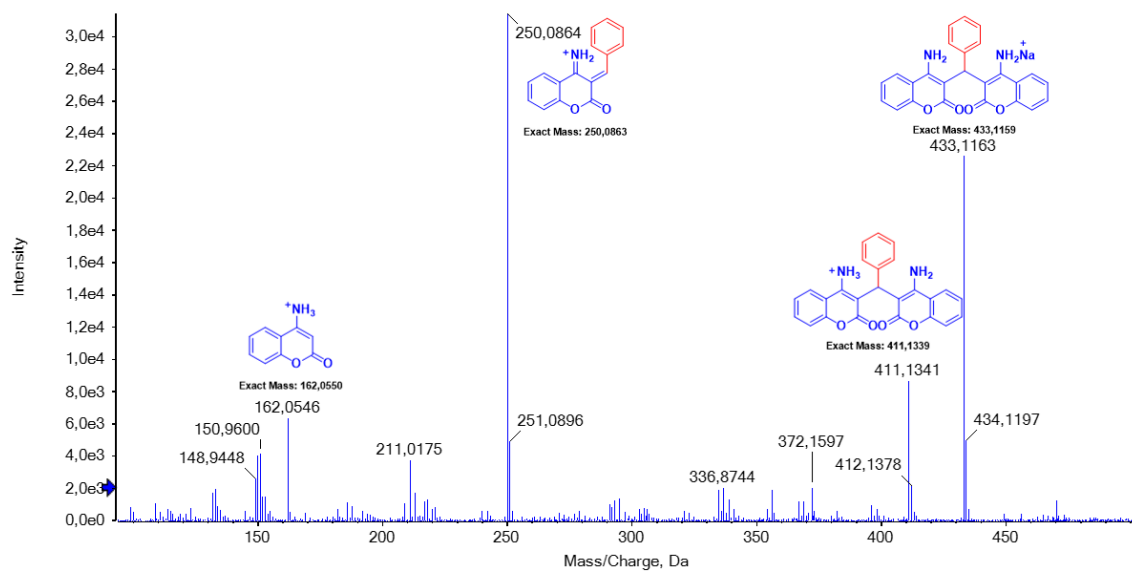

**Figure S7.** Reaction monitoring by HRMS using water as the solvent and at 100 °C. 4-Aminocoumarin was used instead of 4-hydroxycoumarin.

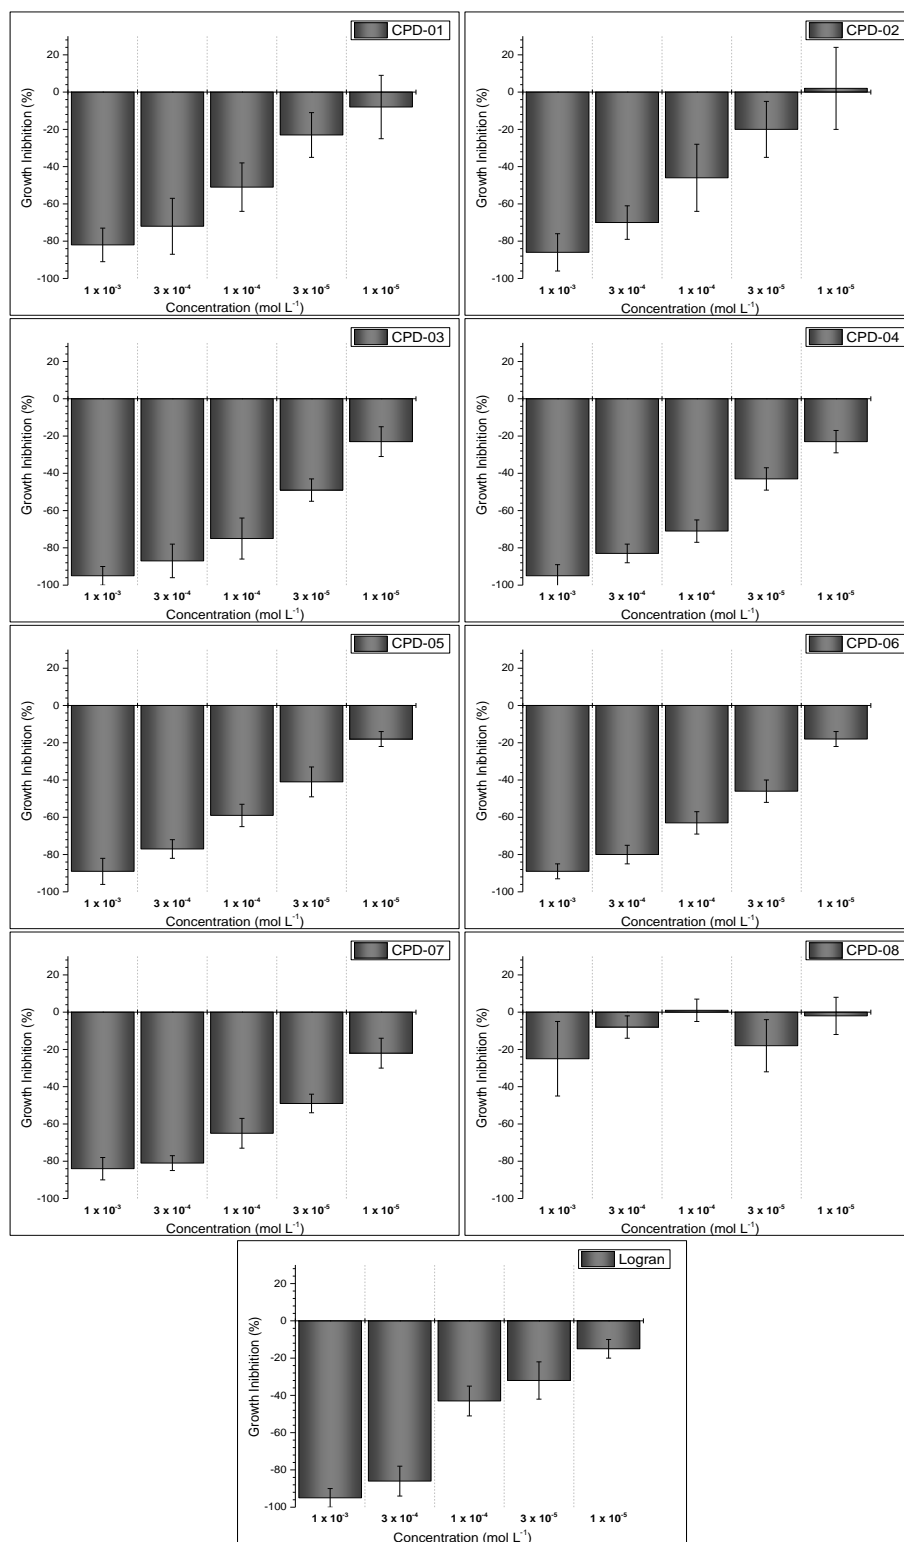

**Figure S8.** Wheat coleoptile bioassay testing the synthesized DC derivatives contaminated with urea or thiourea (proportion of  $\approx 2$  DC : 1 urea/thiourea). Logran is the positive control. **CPDs 01, 03, 05, 07 and 08** are indeed and respectively **DCs 01, 02, 03, 04 and 05** contaminated with urea. **CPDs 02, 04 and 06** are respectively **DCs 01, 02, 03**, contaminated with thiourea.



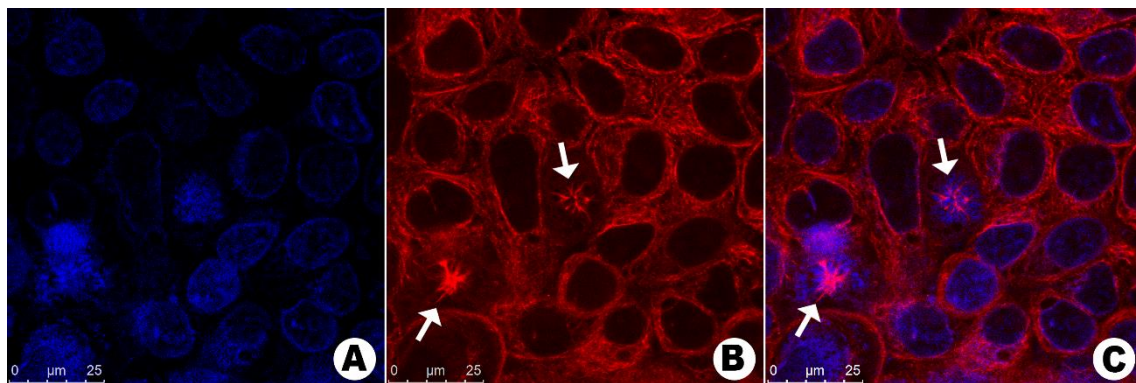

**Figure S9.** Cellular division (mitosis) inhibition by **DC-03** contaminated with urea (proportion of  $\approx 2$  **DC** : 1 urea/thiourea). (A) Nuclei stained with the commercially available DAPI (blue emitter). (B) Anti- $\alpha$ -Tubulin monoclonal antibody (commercially available red emitter). (C) Merged images from (A)-(B). Remarkably, despite the presence of those contaminant, **DC-03** induced monoastral spindles in mitotic cells.

(A)

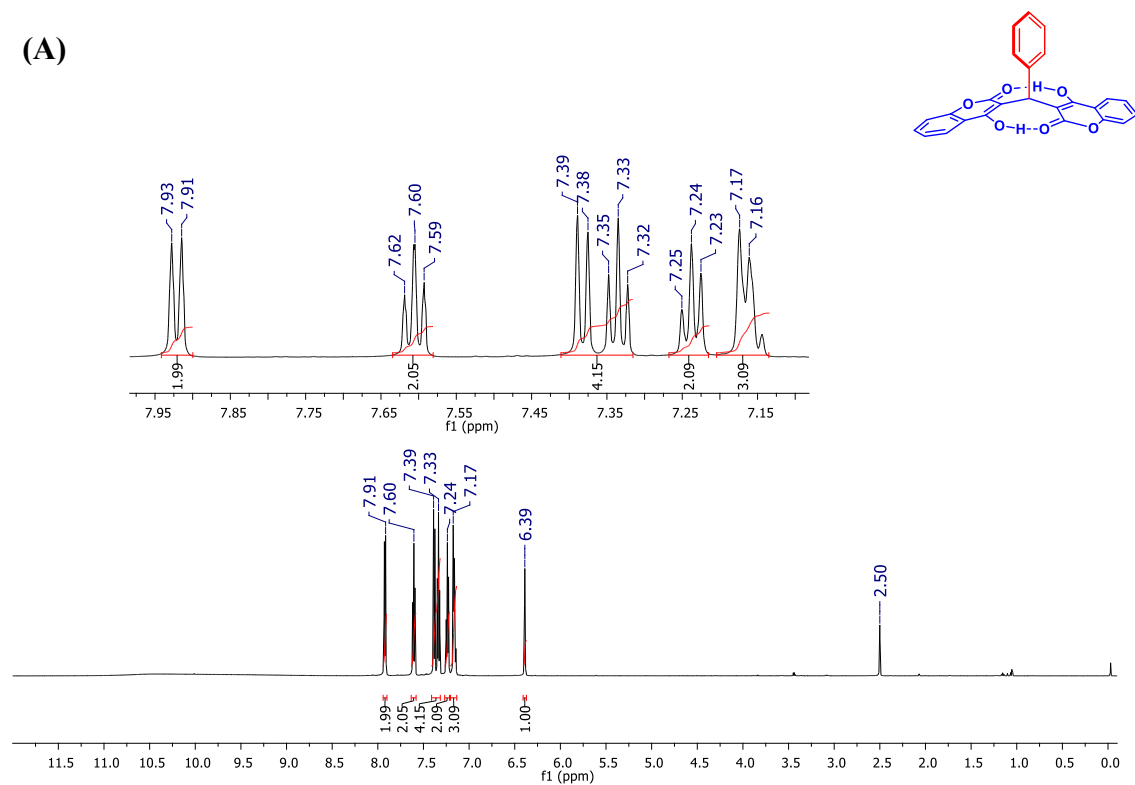

(B)

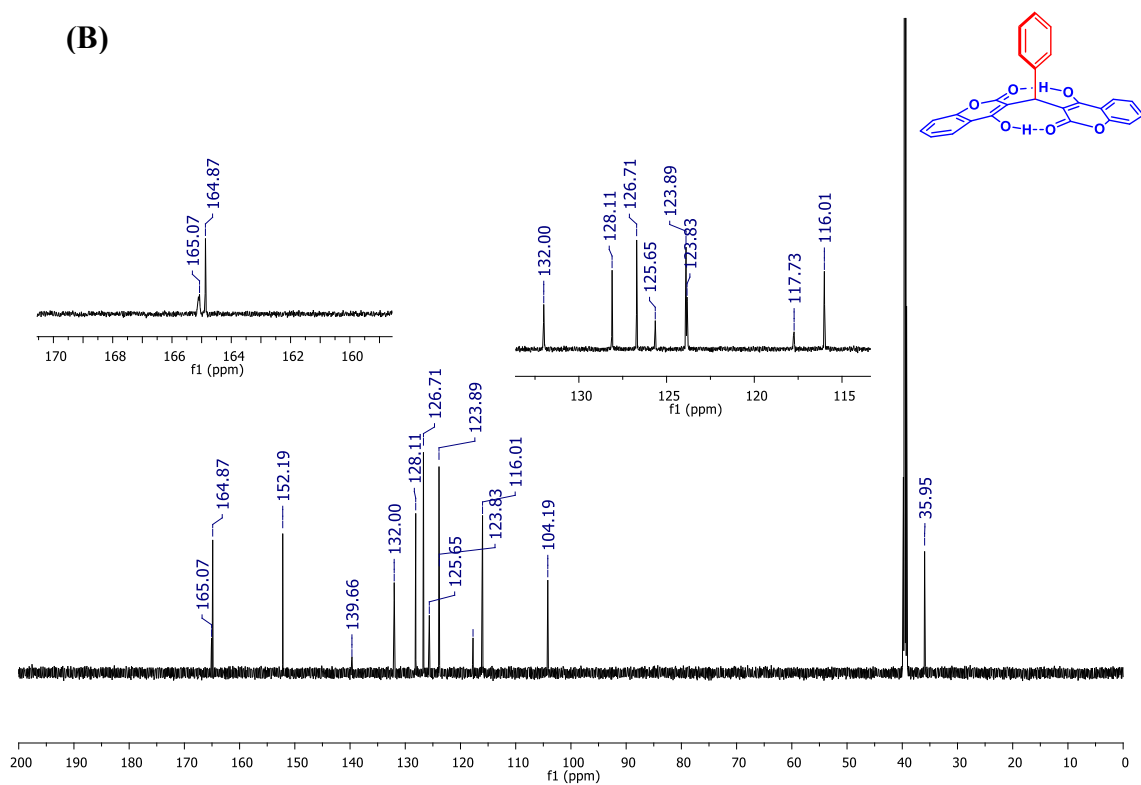

**Figure S10.** (A) <sup>1</sup>H NMR spectrum (600 MHz, DMSO-*d*<sub>6</sub>) of DC-01. (B) <sup>13</sup>C{<sup>1</sup>H} NMR spectrum (150 MHz, DMSO-*d*<sub>6</sub>) of DC-01.

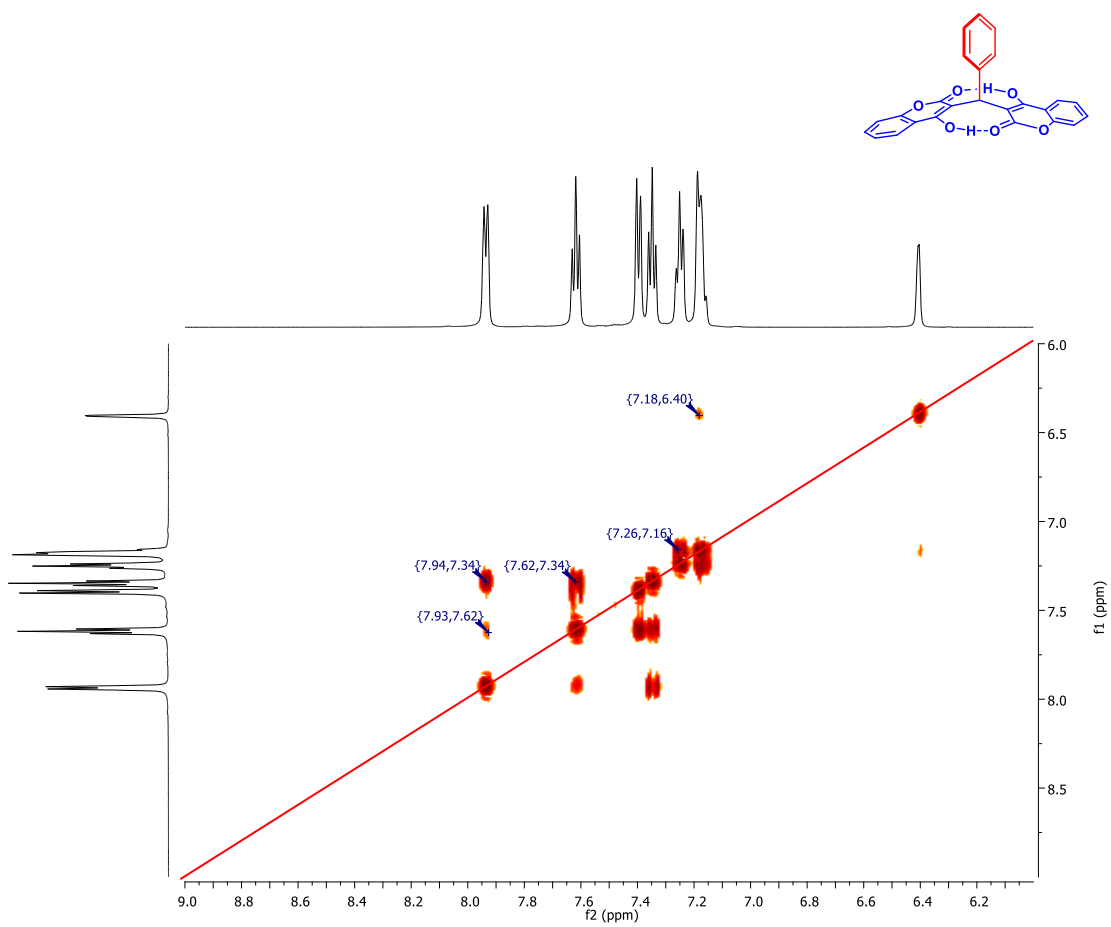

**Figure S11.** 2D COSY NMR (600 MHz, DMSO-*d*<sub>6</sub>) for DC-01.

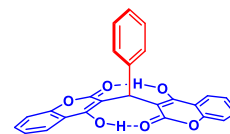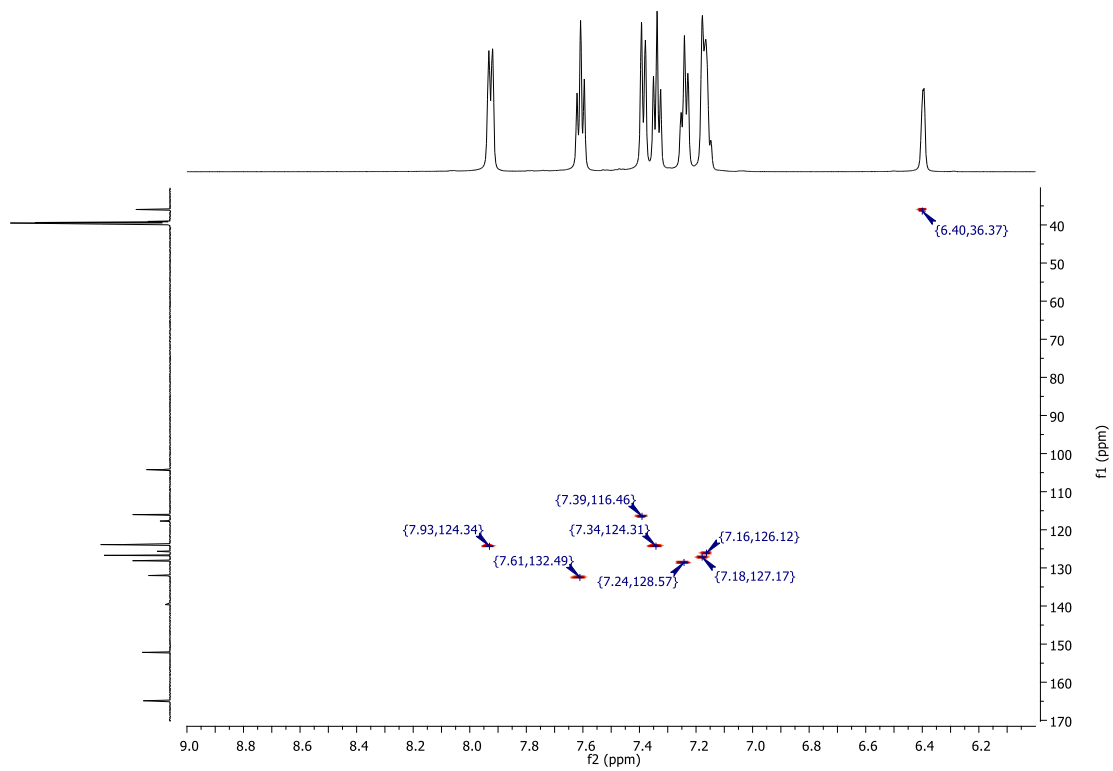

**Figure S12.** 2D HSQC NMR (600 MHz and 150 MHz, DMSO-*d*<sub>6</sub>) for DC-01.

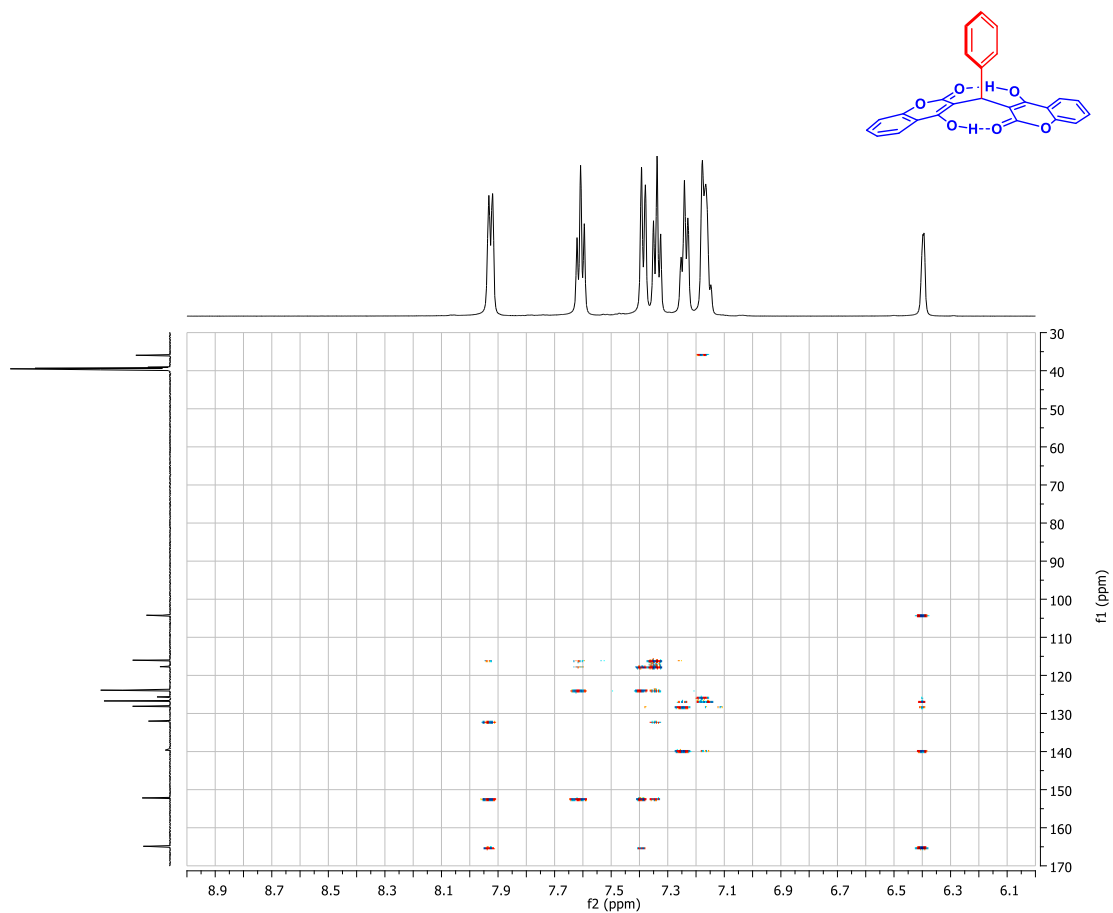

**Figure S13.** 2D HMBC (600 MHz and 150 MHz, DMSO-*d*<sub>6</sub>) for DC-01.

(A)

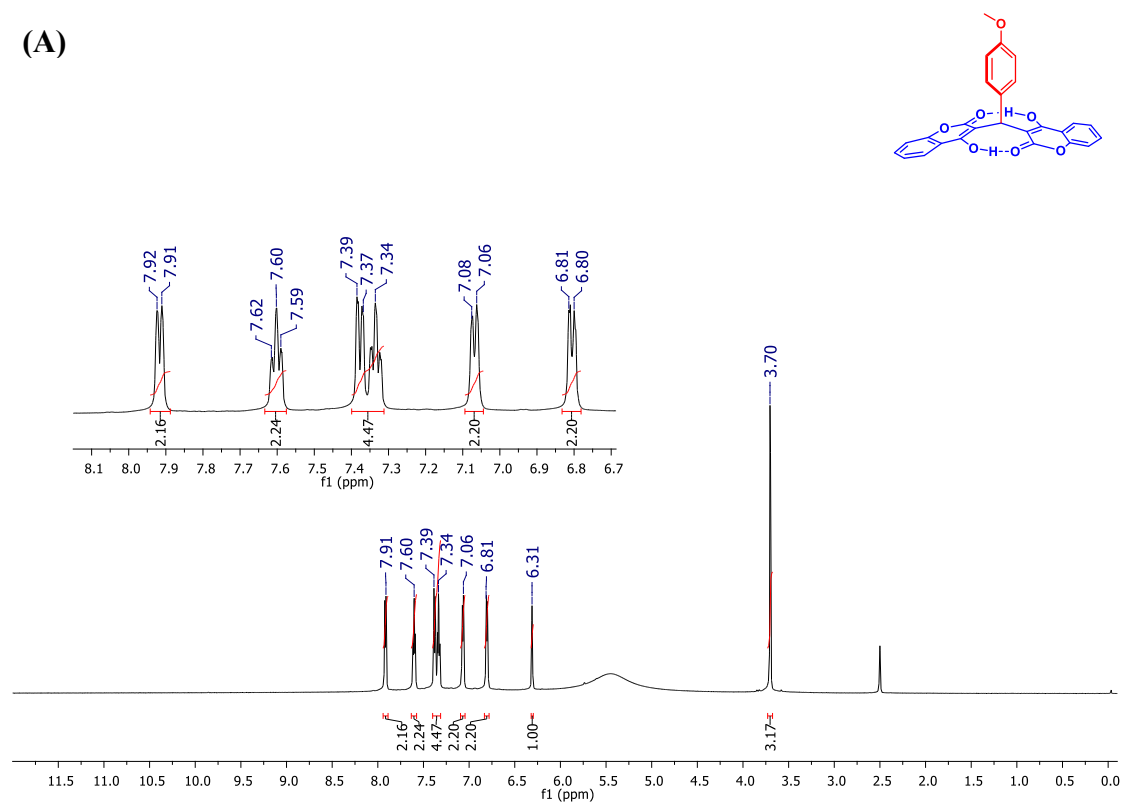

(B)

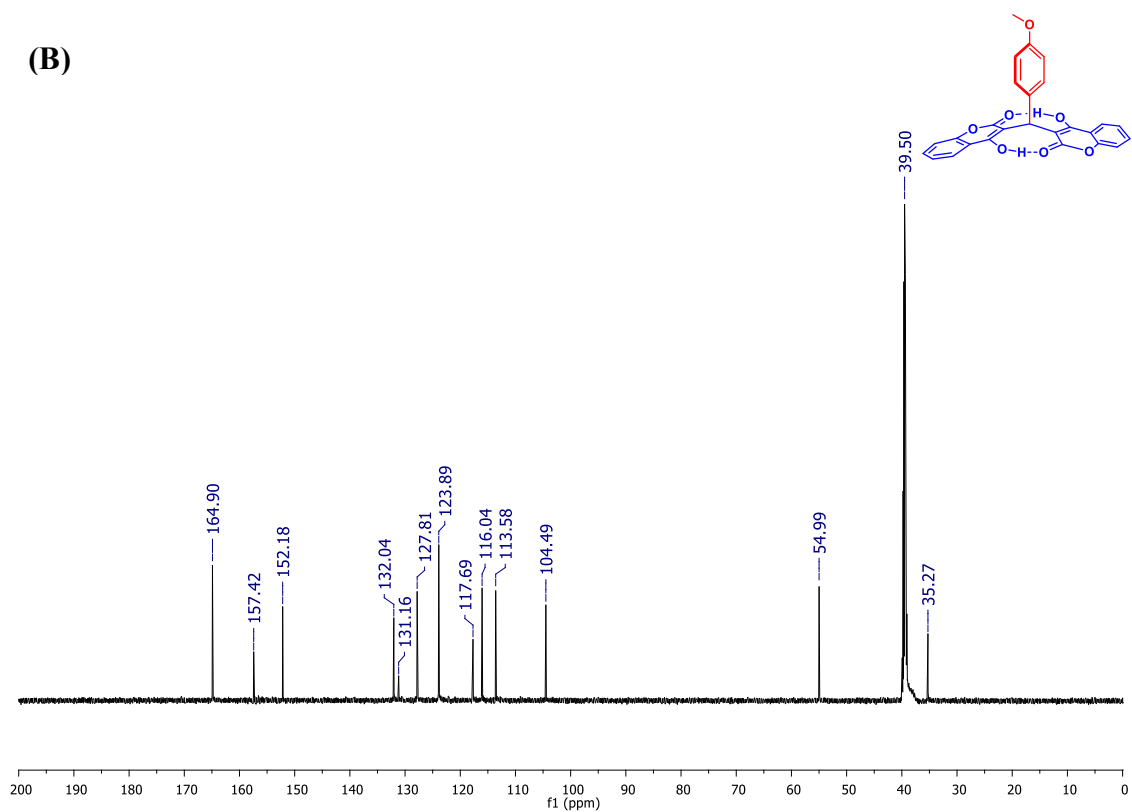

**Figure S14.** (A)  $^1\text{H}$  NMR spectrum (600 MHz,  $\text{DMSO-}d_6$ ) of DC-02. (B)  $^{13}\text{C}\{^1\text{H}\}$  NMR spectrum (150 MHz,  $\text{DMSO-}d_6$ ) of DC-02.

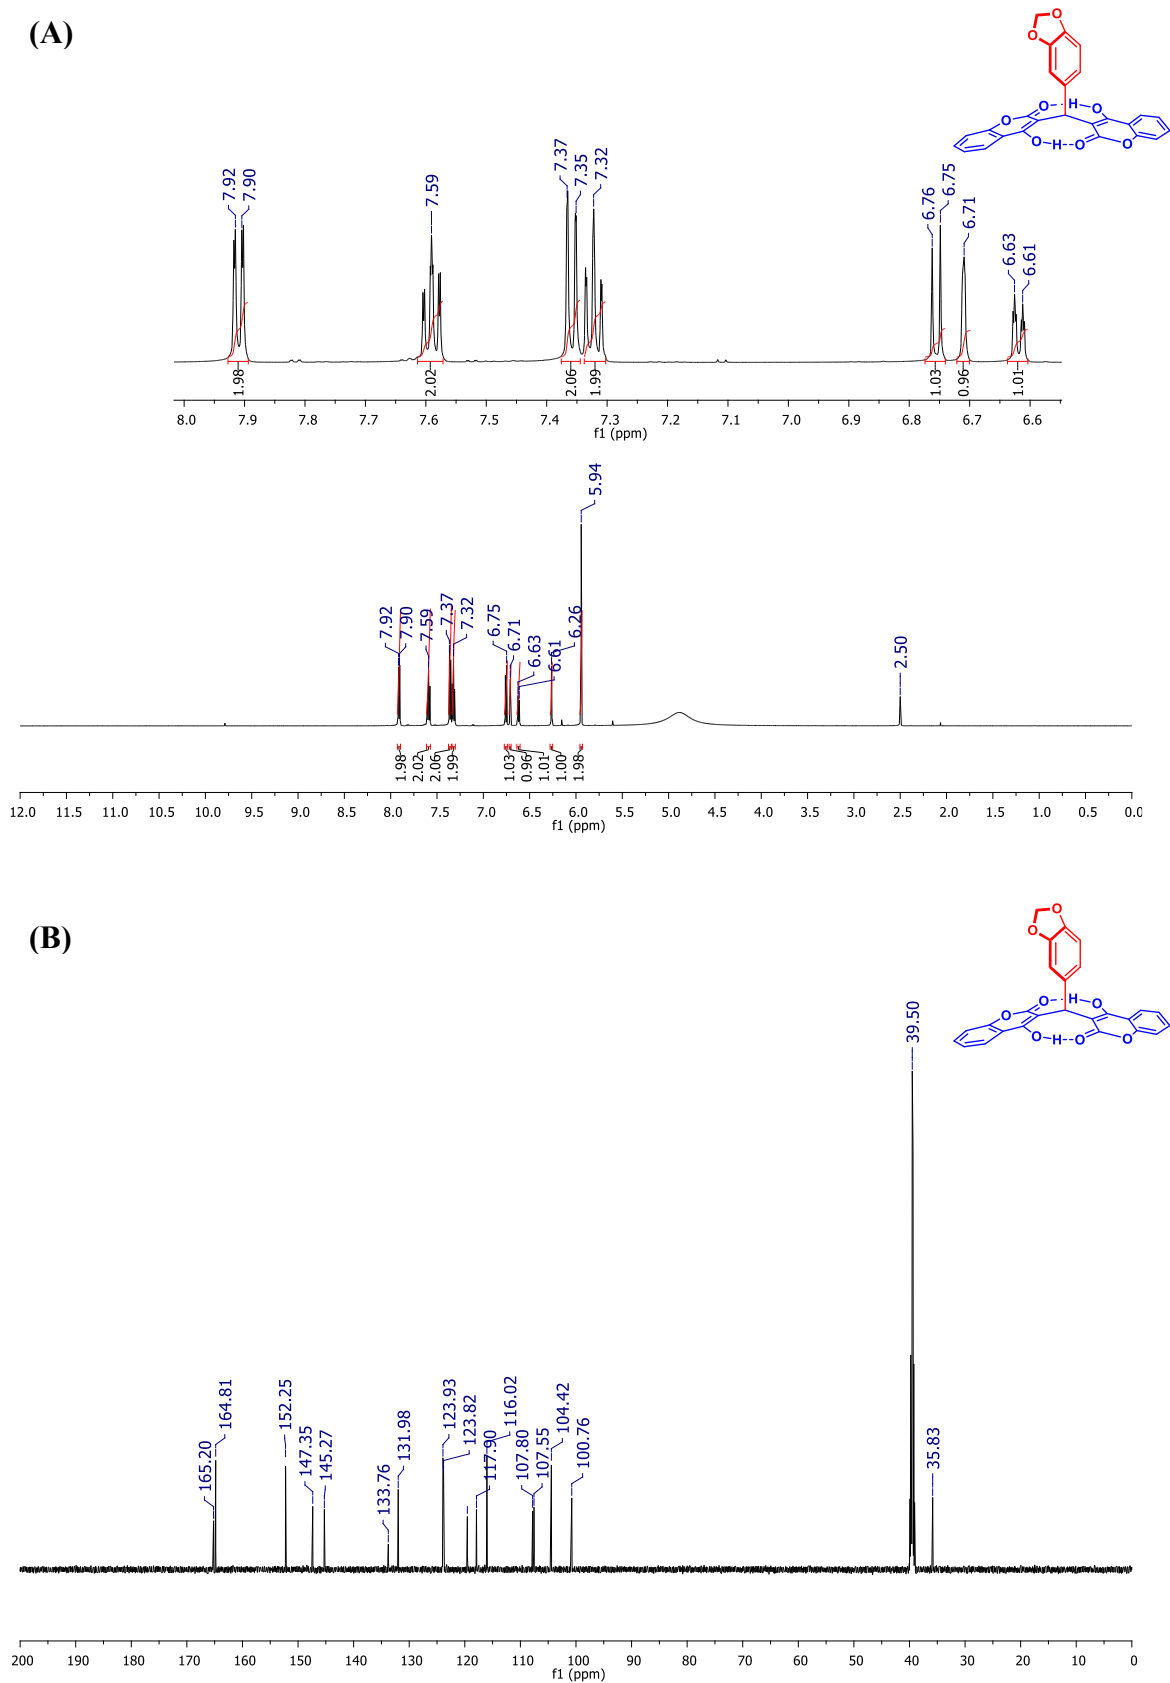

**Figure S15.** (A)  $^1\text{H}$  NMR spectrum (600 MHz,  $\text{DMSO}-d_6$ ) of DC-03. (B)  $^{13}\text{C}\{^1\text{H}\}$  NMR spectrum (150 MHz,  $\text{DMSO}-d_6$ ) of DC-03.

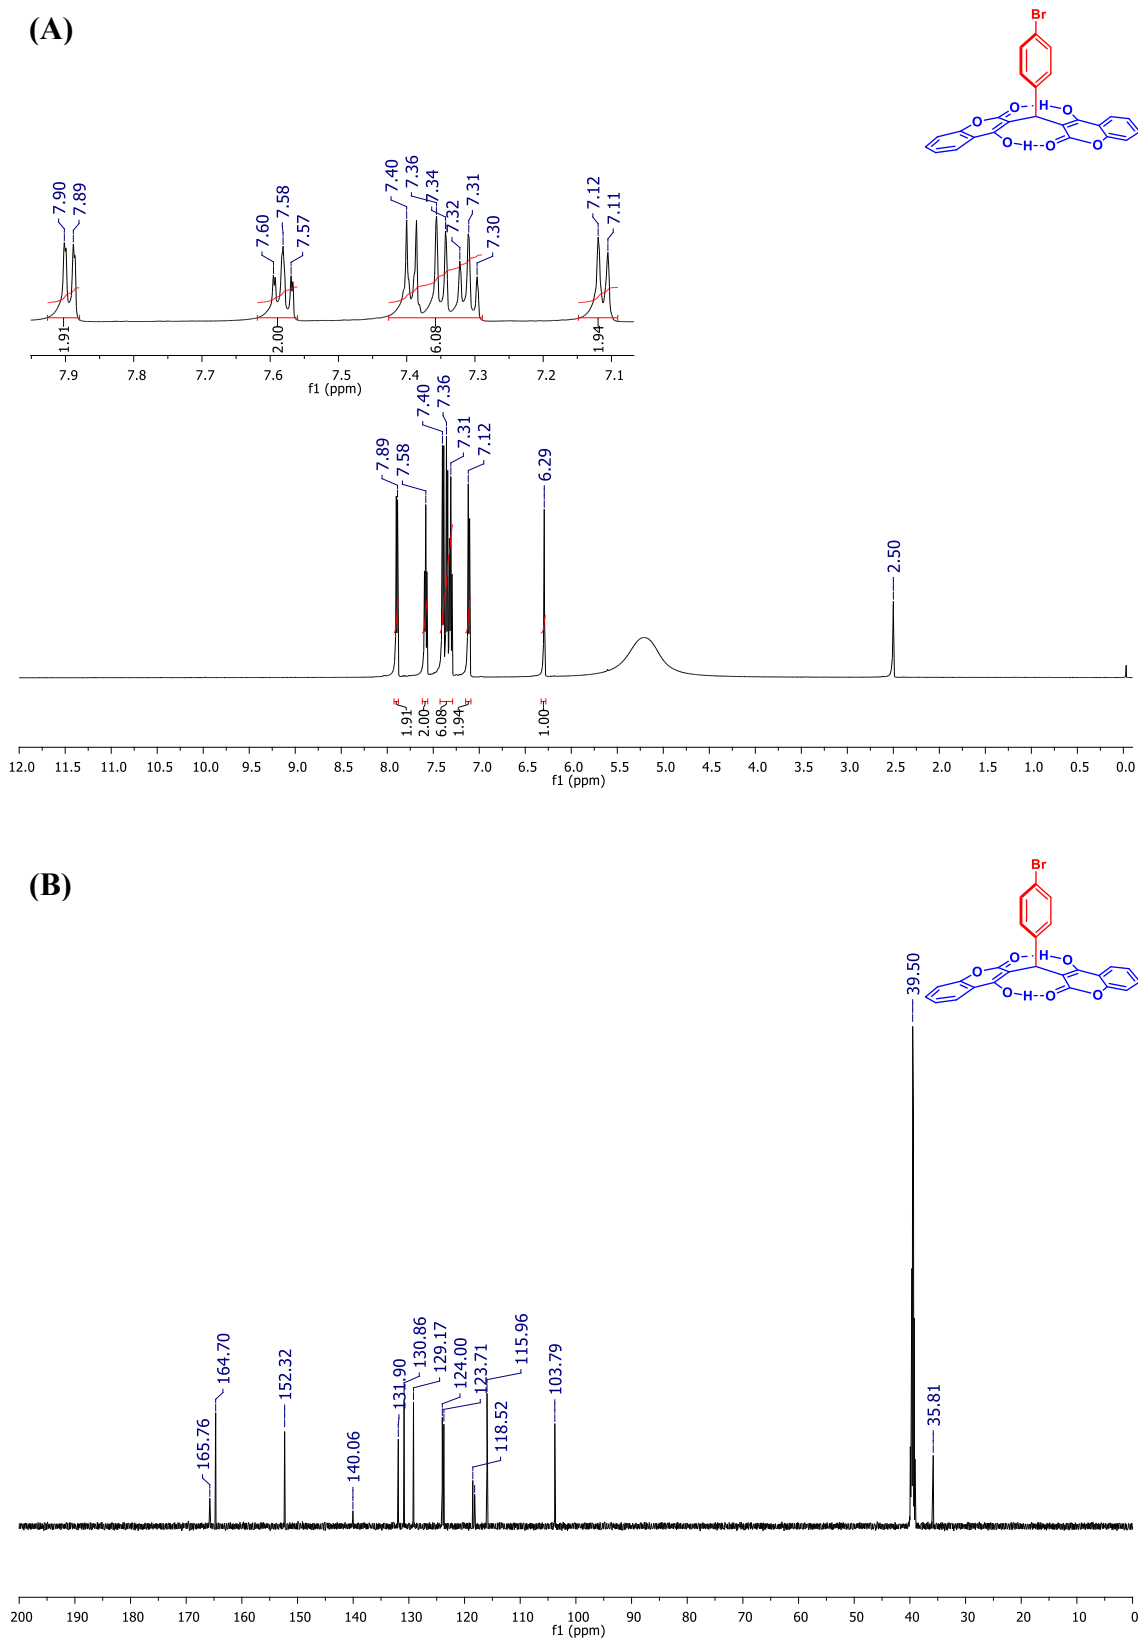



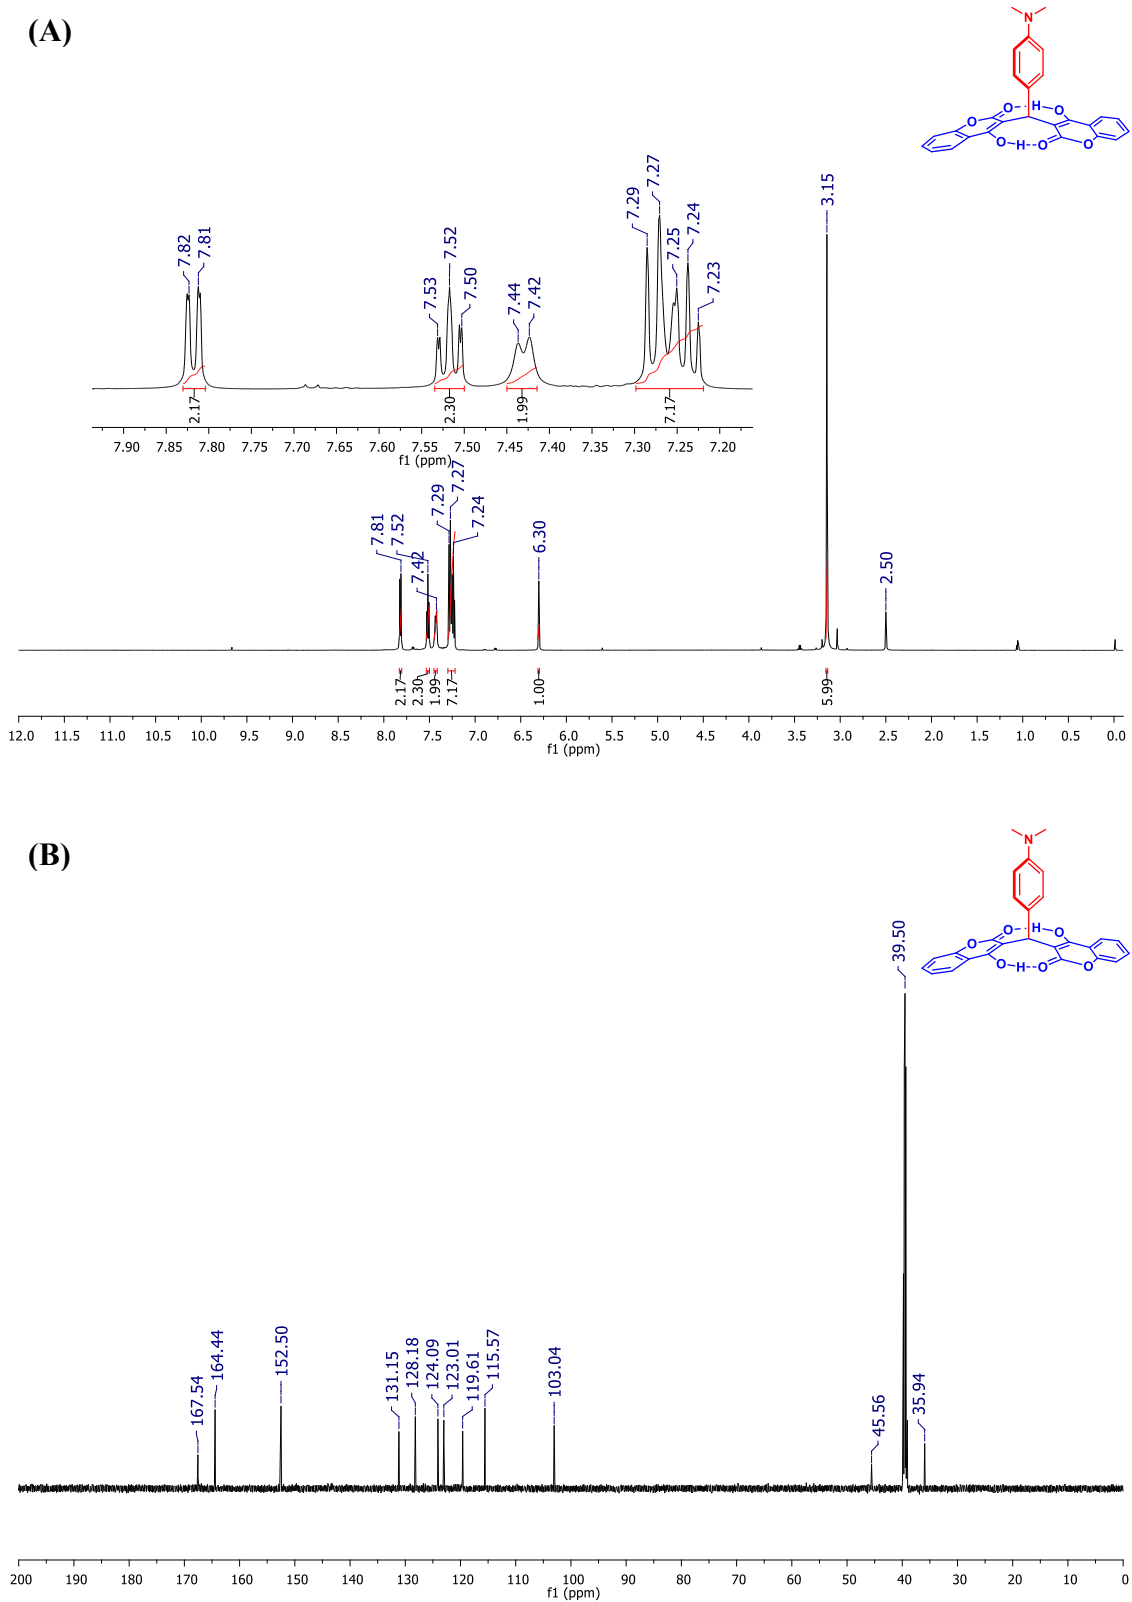

**Figure S17.** (A)  $^1\text{H}$  NMR spectrum (600 MHz,  $\text{DMSO-}d_6$ ) of DC-05. (B)  $^{13}\text{C}\{^1\text{H}\}$  NMR spectrum (150 MHz,  $\text{DMSO-}d_6$ ) of DC-05.

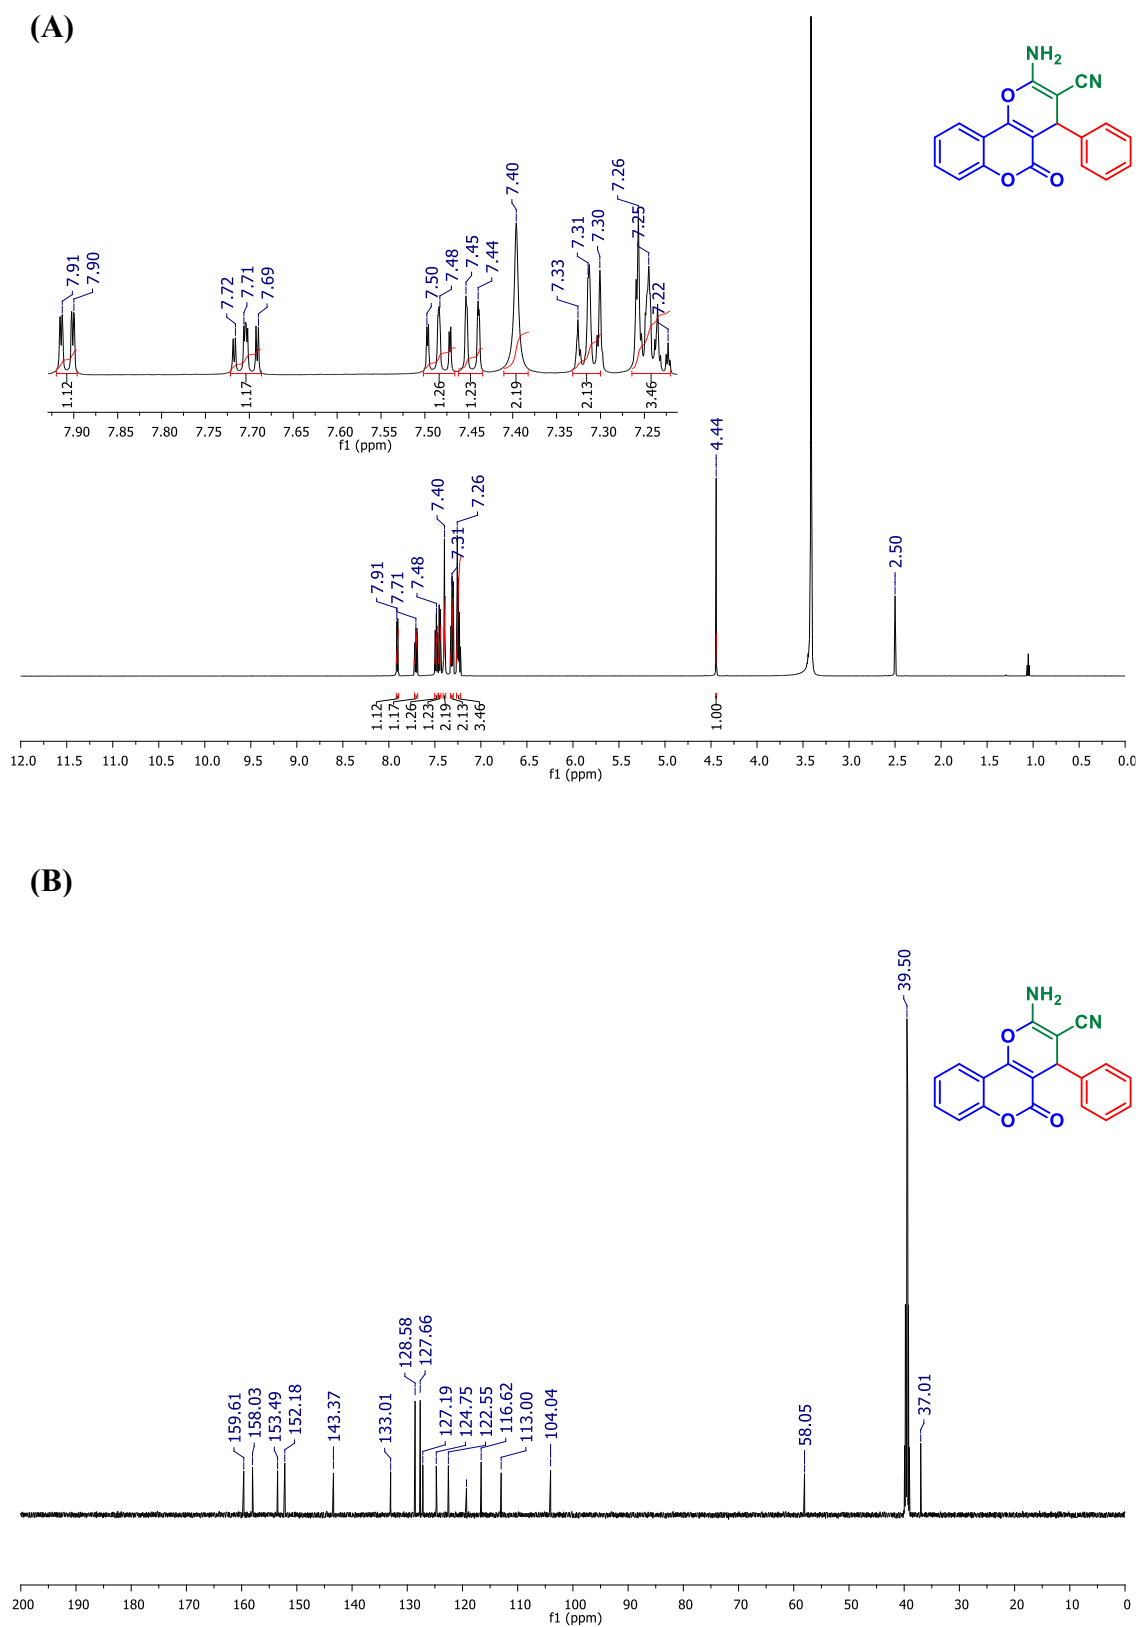

**Figure S18.** (A)  $^1\text{H}$  NMR spectrum (600 MHz,  $\text{DMSO-}d_6$ ) of APC-01. (B)  $^{13}\text{C}\{^1\text{H}\}$  NMR spectrum (150 MHz,  $\text{DMSO-}d_6$ ) of APC-01.

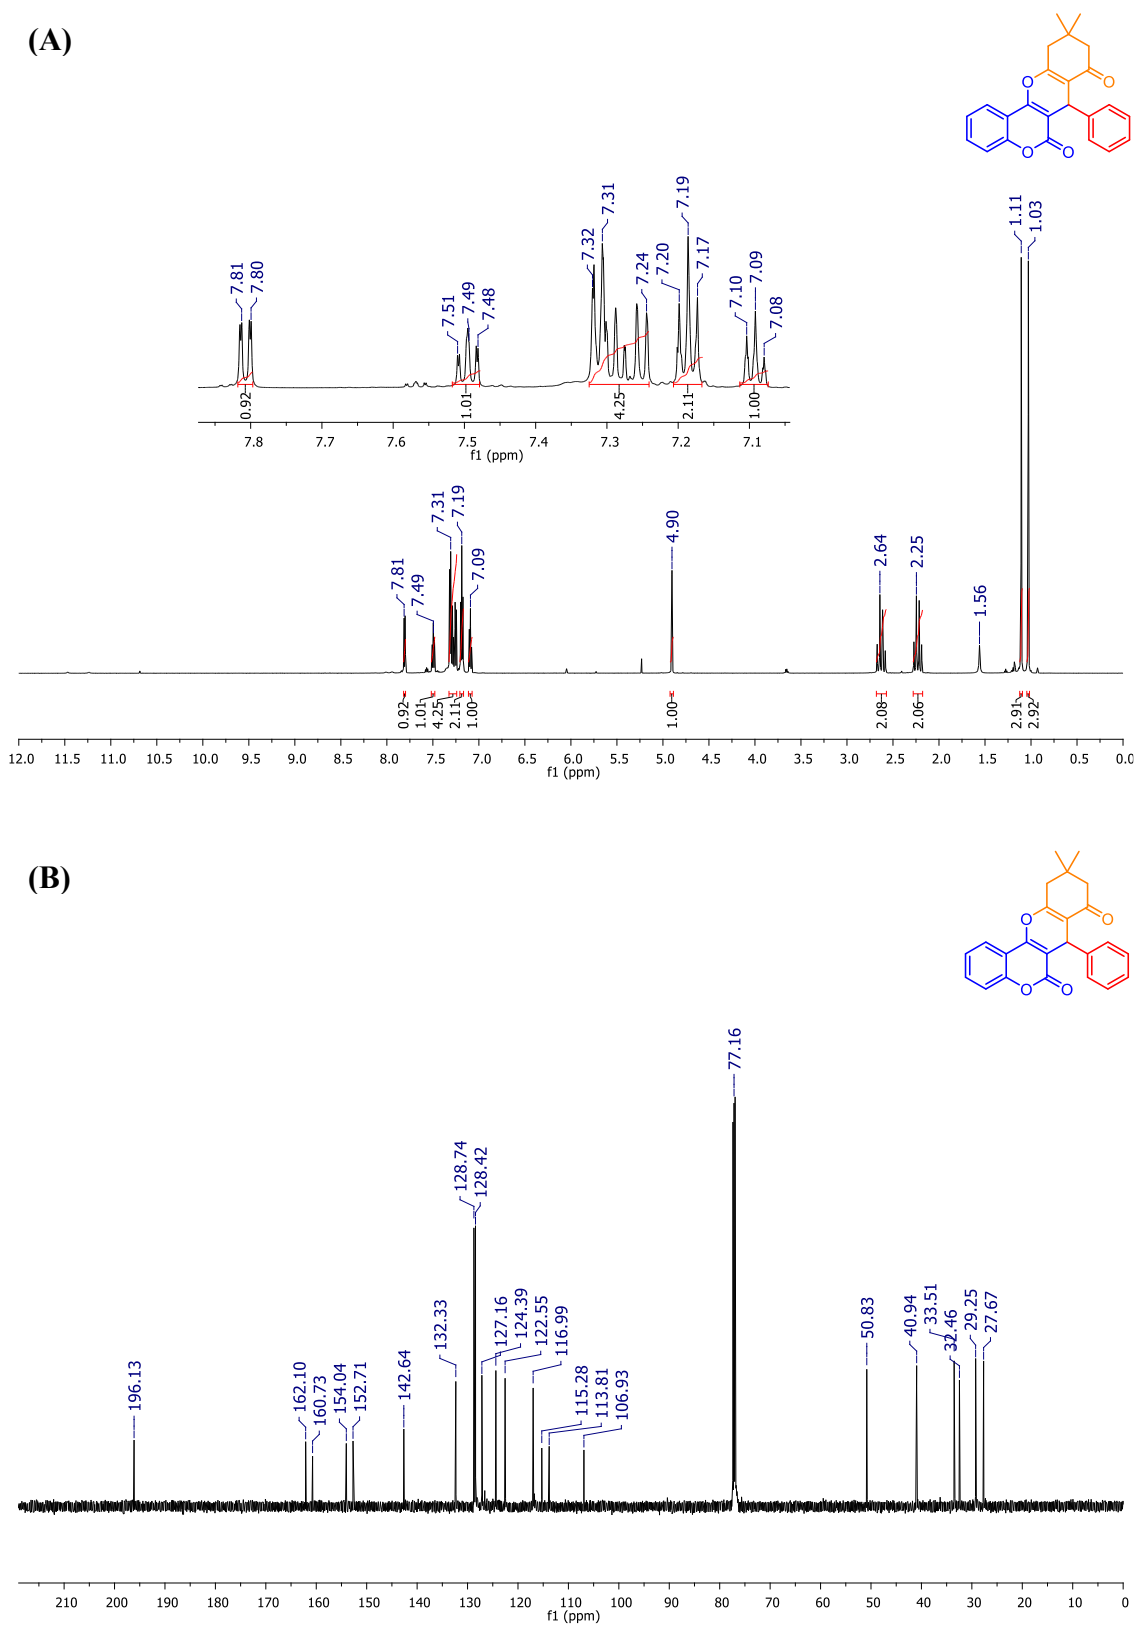

**Figure S19.** (A)  $^1\text{H}$  NMR spectrum (600 MHz,  $\text{CDCl}_3$ ) of TCC-01. (B)  $^{13}\text{C}\{^1\text{H}\}$  NMR spectrum (150 MHz,  $\text{CDCl}_3$ ) of TCC-01.

(A)

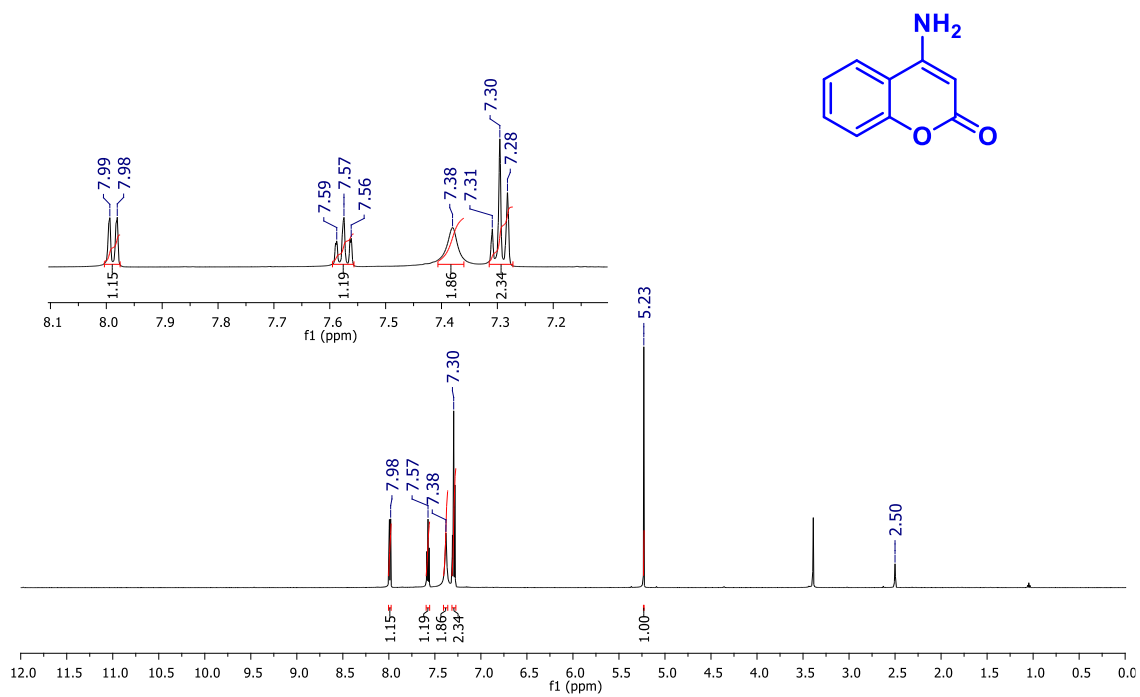

(B)

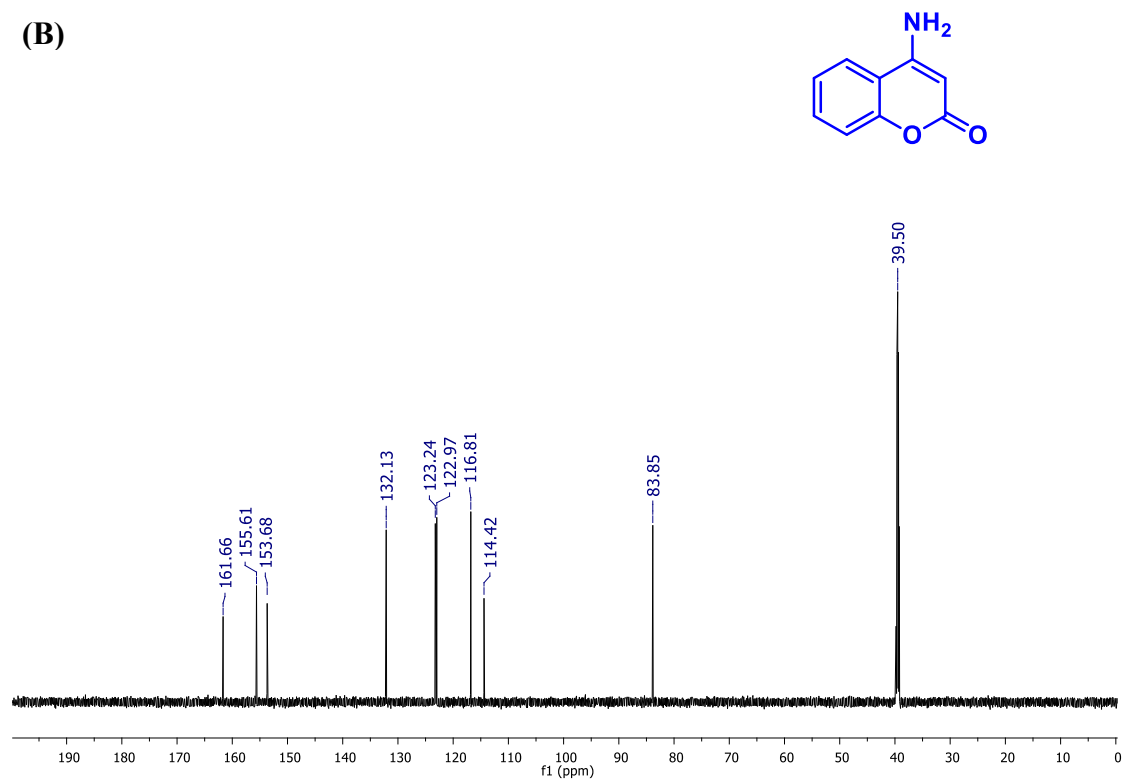

**Figure S20.** (A)  $^1\text{H}$  NMR spectrum (600 MHz,  $\text{DMSO-}d_6$ ) of 4-aminocoumarin. (B)  $^{13}\text{C}\{^1\text{H}\}$  NMR spectrum (150 MHz,  $\text{DMSO-}d_6$ ) of 4-aminocoumarin.

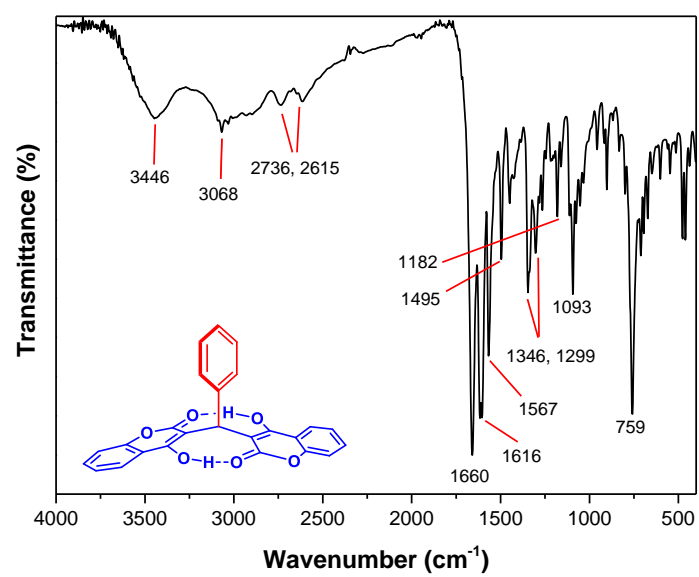

**Figure S21.** FTIR (KBr) spectrum for DC-01.

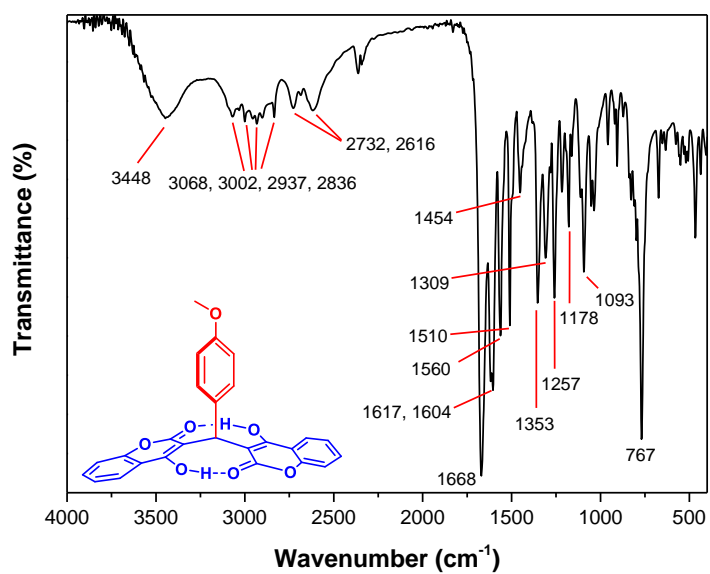

**Figure S22.** FTIR (KBr) spectrum for DC-02.

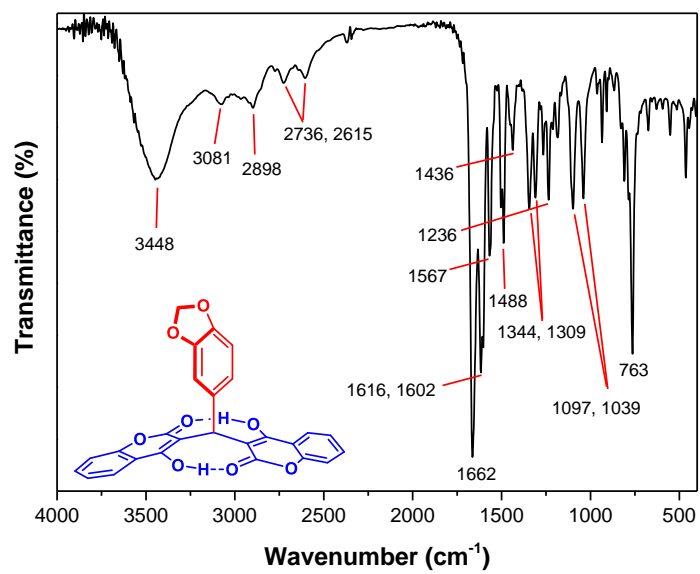

**Figure S23.** FTIR (KBr) spectrum for **DC-03**.

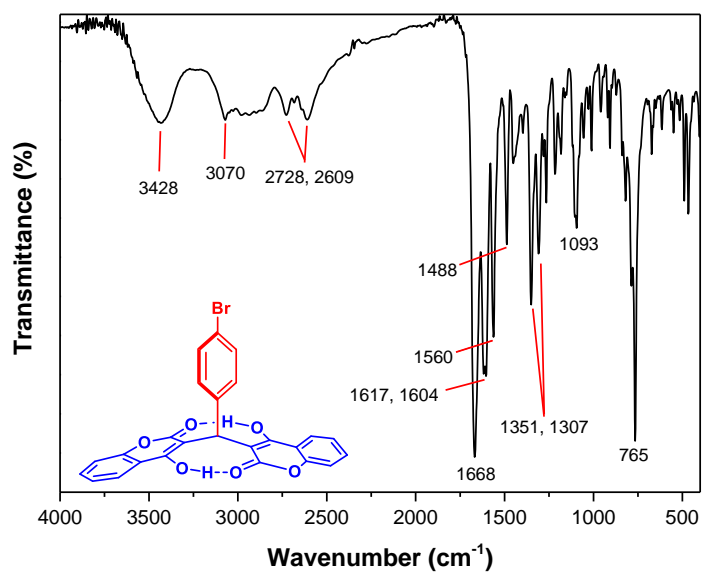

**Figure S24.** FTIR (KBr) spectrum for **DC-04**.

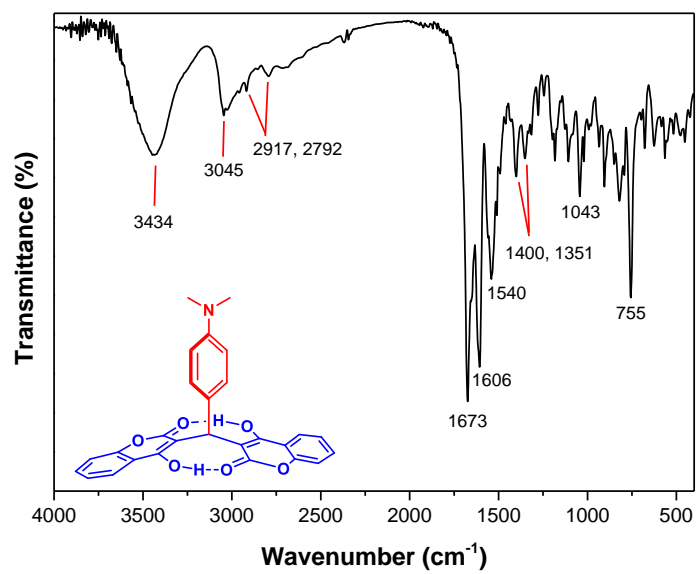

Figure S25. FTIR (KBr) spectrum for DC-05.

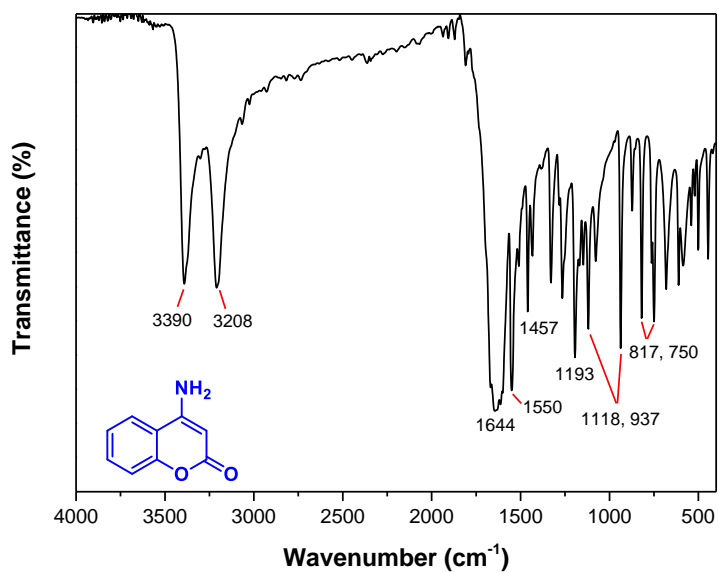

Figure S26. FTIR (KBr) spectrum for 4-aminocoumarin.

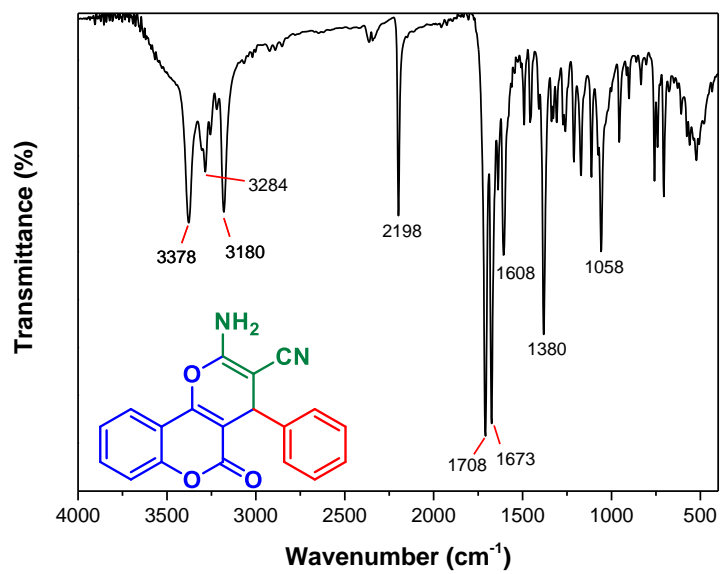

Figure S27. FTIR (KBr) spectrum for APC-01.

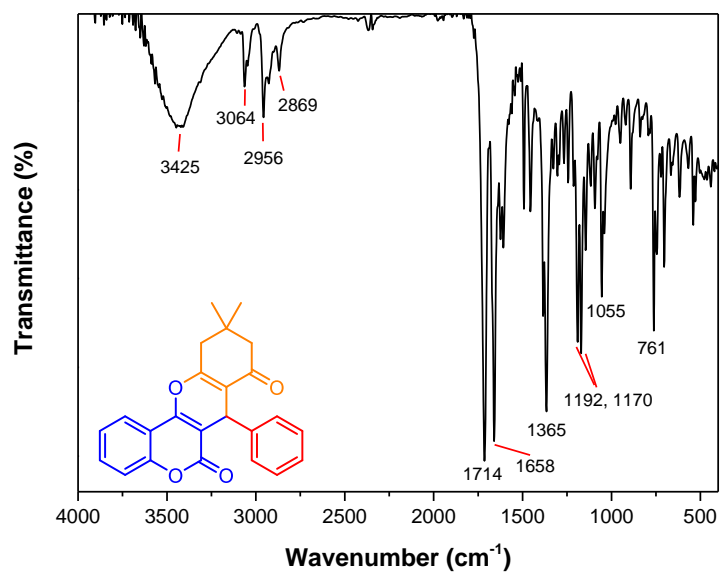

Figure S28. FTIR (KBr) spectrum for TCC-01.



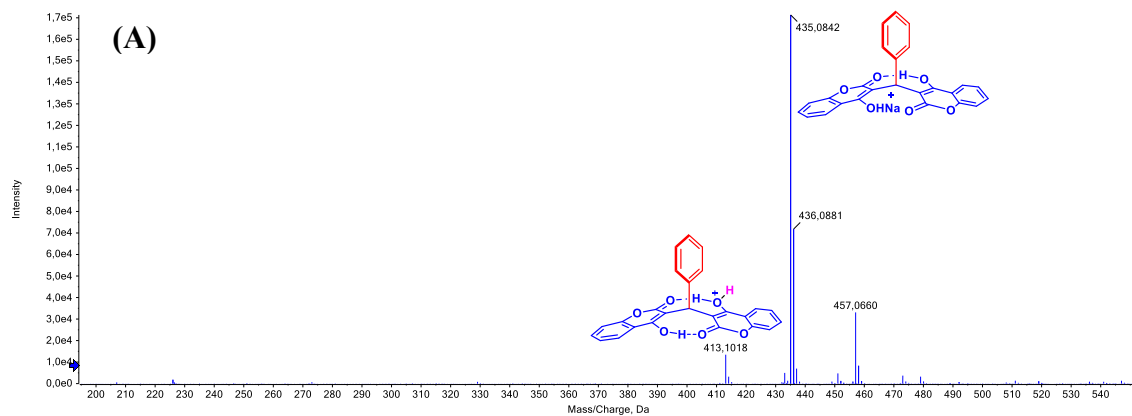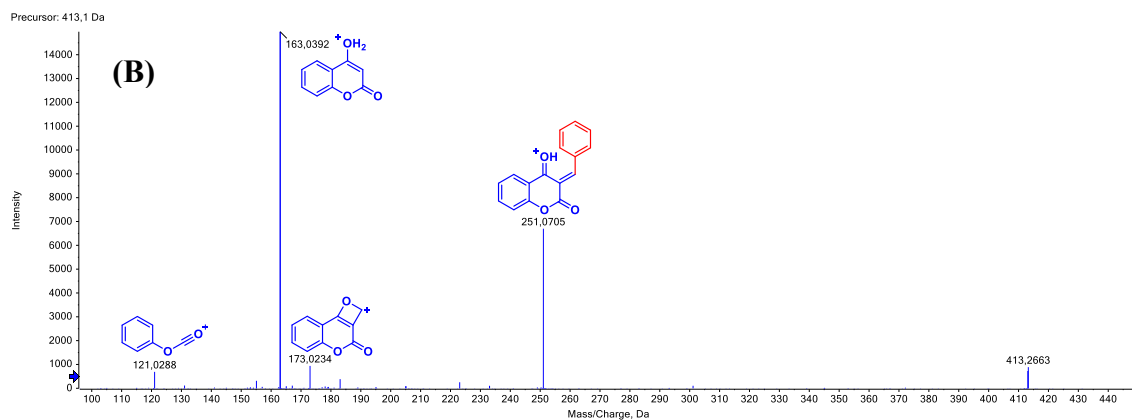

**Figure S29. (A) ESI(+)-MS for DC-01. (B) ESI(+)-MS/MS for DC-01.**

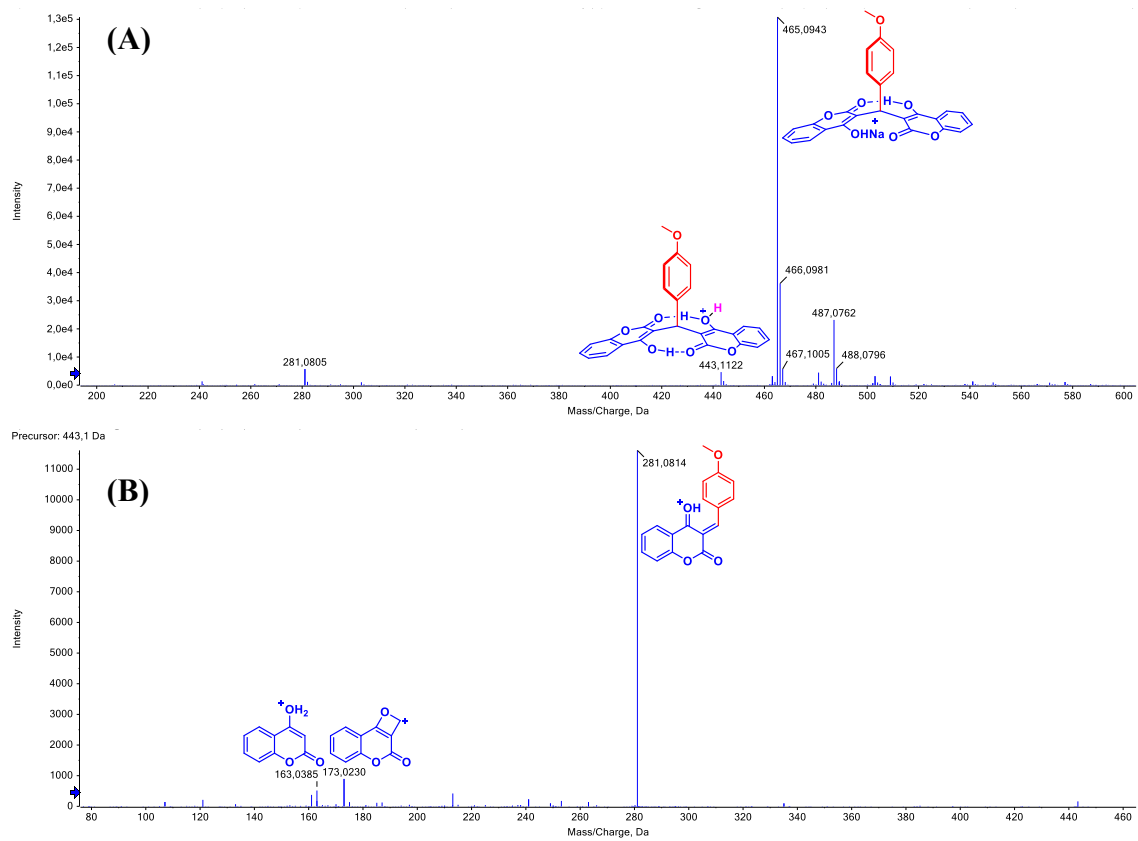

**Figure S30. (A) ESI(+)-MS for DC-02. (B) ESI(+)-MS/MS for DC-02.**

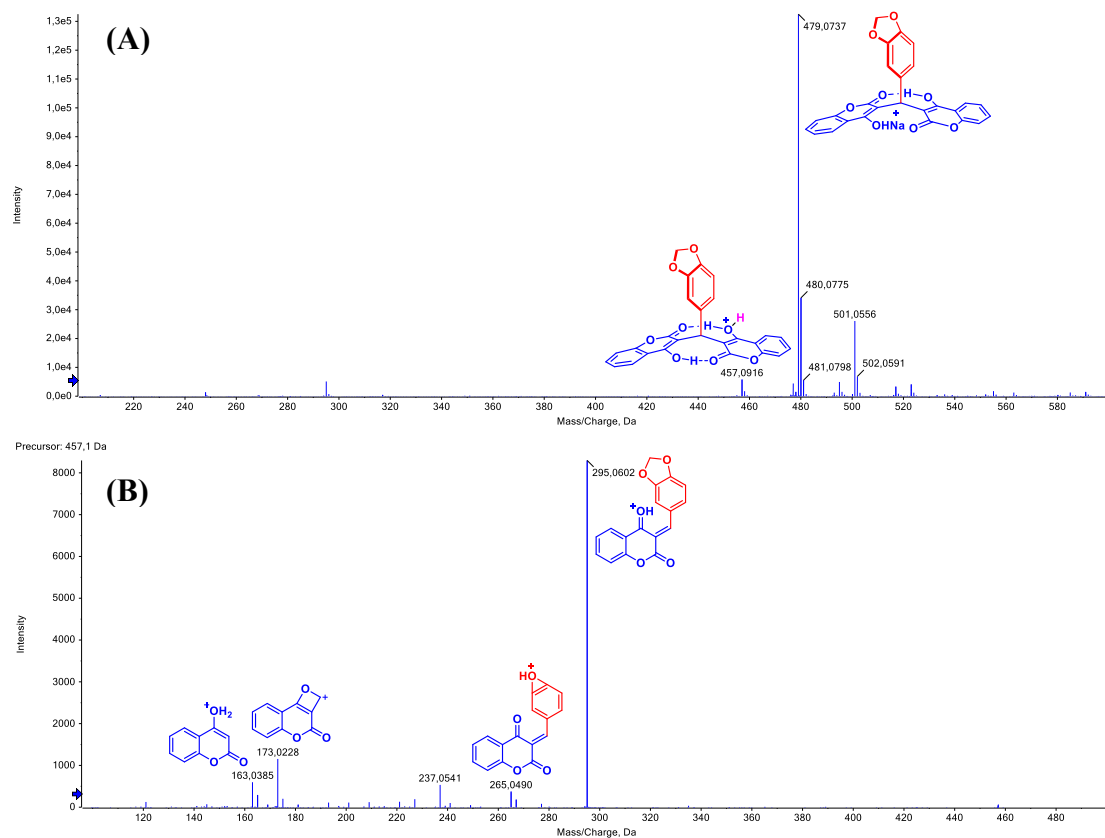

**Figure S31.** (A) ESI(+)-MS for DC-03. (B) ESI(+)-MS/MS for DC-03.

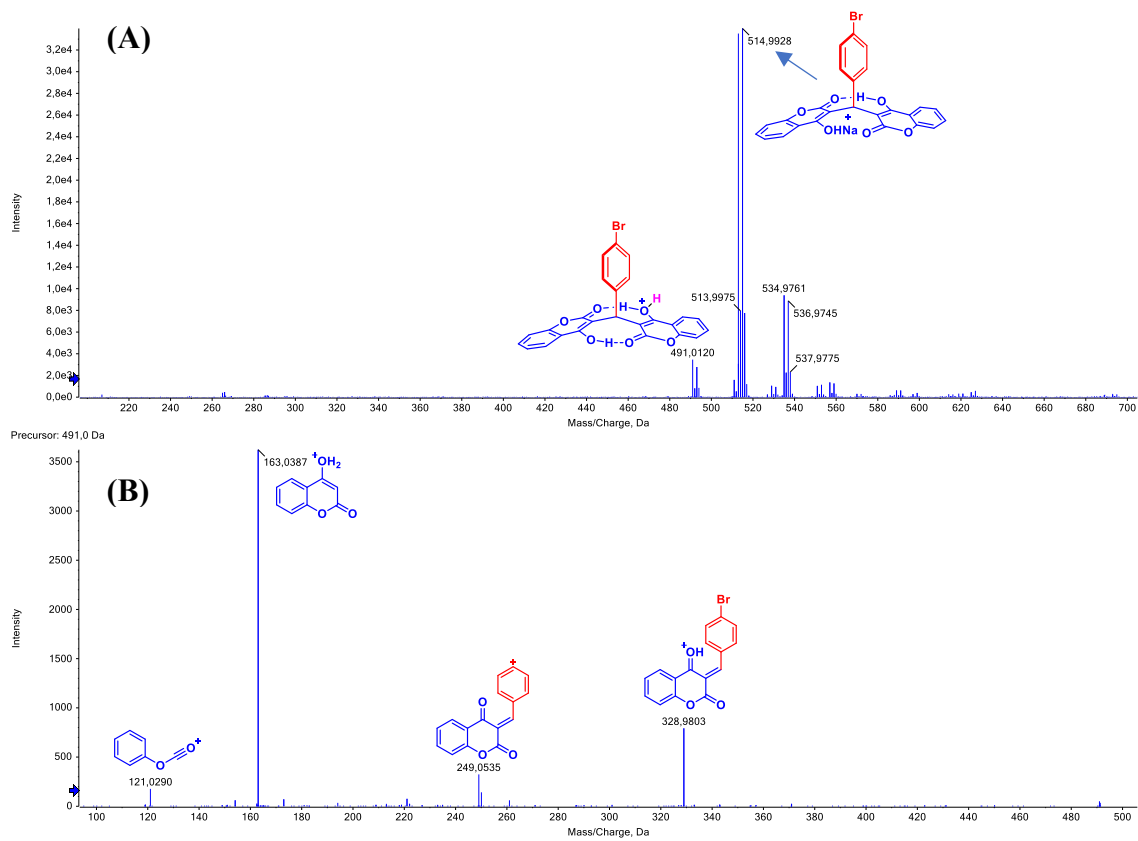

**Figure S32. (A) ESI(+)-MS for DC-04. (B) ESI(+)-MS/MS for DC-04.**

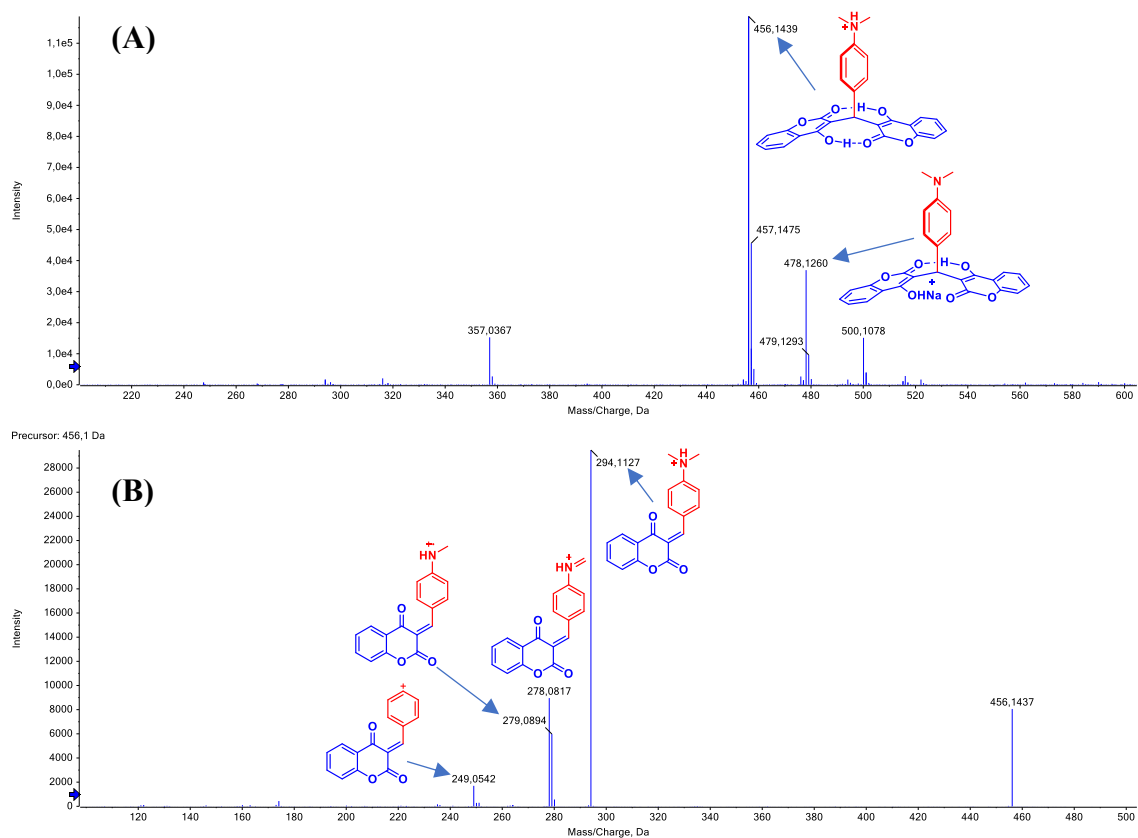

**Figure S33. (A) ESI(+)-MS for DC-05. (B) ESI(+)-MS/MS for DC-05.**

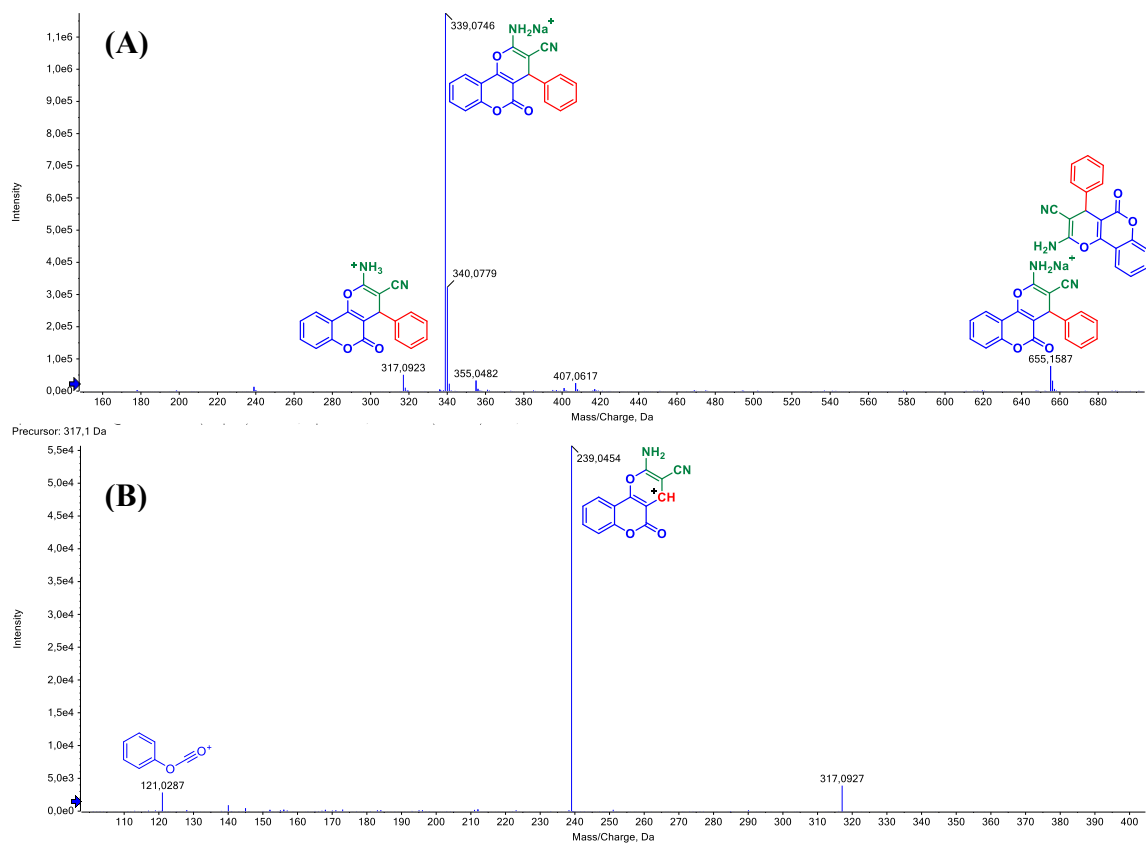

**Figure S34. (A) ESI(+)-MS for APC-01. (B) ESI(+)-MS/MS for APC-01.**

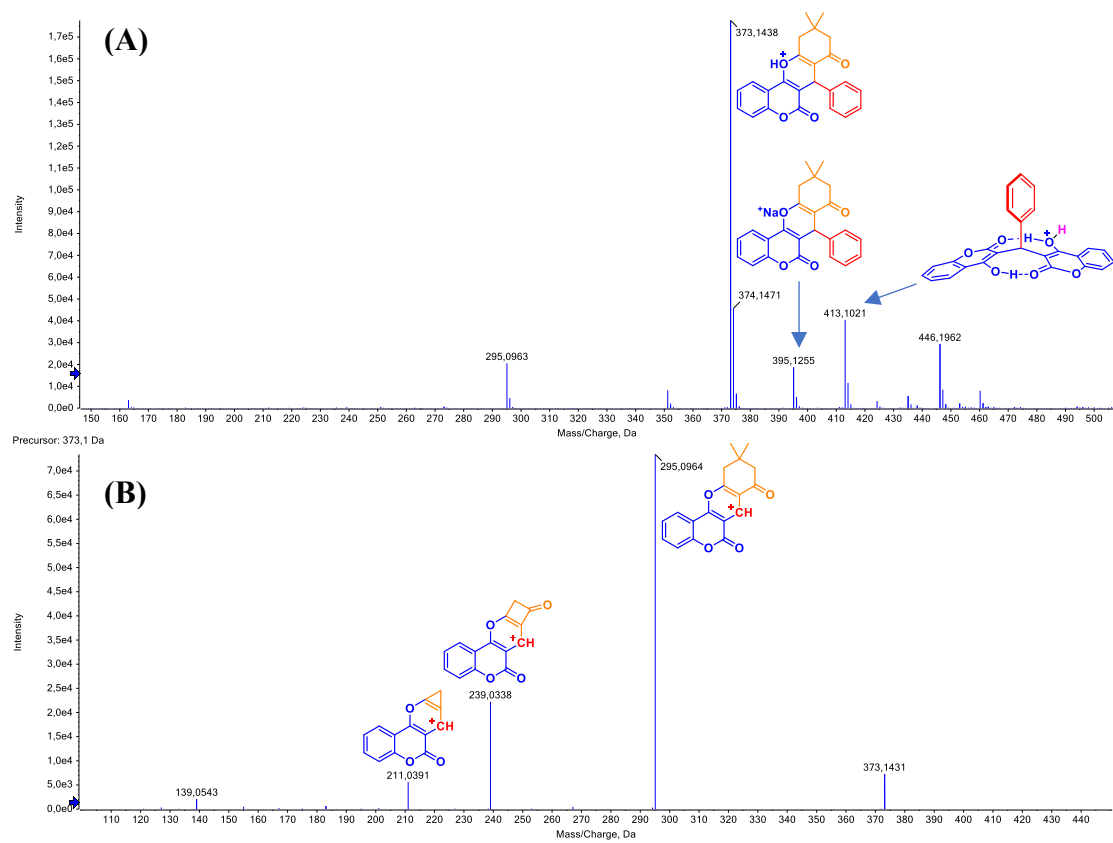

**Figure S35.** (A) ESI(+)-MS for TCC-01. (B) ESI(+)-MS/MS for TCC-01.

### Determination of numerical values

Productivity is formally expressed as the molar ratio of the produced output to the unreacted limiting reagent. This can be determined through the following equation:

$$Productivity = \frac{n_{product}}{(1 - Yield) * n_{LimitingReactant}} \equiv \frac{Yield}{1 - Yield}$$

Example: In the synthesis of DC-01, 0.297 g of the compound was obtained from a reaction involving 2 mmol of 4-hydroxycoumarin and 1 mmol of benzaldehyde. This yield corresponds to approximately 0.72 mmol, resulting in a 72% yield. Calculating the productivity using the productivity equation, the value for this synthesis is 2.57, as demonstrated below.

$$\frac{0.72 \text{ mmol}}{(1 - 0.72) * 1 \text{ mmol}} \equiv \frac{0.72}{1 - 0.72} = 2.57$$

The impact of the solvent was investigated by correlating the Kamlet-Taft solvatochromic parameters of each solvent with the natural logarithm of productivity.



## References

1. G. Sabitha, G. K. K. Reddy, K. B. Reddy and J. Yadav, *Tetrahedron Lett.*, 2003, **44**, 6497-6499.
2. M. Kidwai, S. Saxena and R. Mohan, *Russ. J. Org. Chem.*, 2006, **42**, 52-55.
3. M. Kidwai, Priya and S. Rastogi, *Z. Naturforsch. B*, 2008, **63**, 71-76.
4. P. K. Ambre, R. R. S. Pissurlenkar, R. D. Wavhale, M. S. Shaikh, V. M. Khedkar, B. Wan, S. G. Franzblau and E. C. Coutinho, *Med. Chem. Res.*, 2014, **23**, 2564-2575.
5. H. Mehrabi and M. Baniasad-Dashtabi, *J. Chem. Res.*, 2015, **39**, 294-295.
6. S. Abdolmohammadi and S. Karimpour, *Chin. Chem. Lett.*, 2016, **27**, 114-118.
7. P. K. Sahu, *RSC Adv.*, 2016, **6**, 67651-67661.
8. S. Sadjadi, M. M. Heravi and M. Malmir, *Res. Chem. Interm.*, 2017, **43**, 6701-6717.
9. S. Sadjadi, M. M. Heravi and M. Malmir, *Appl. Organomet. Chem.*, 2018, **32**, e4286.
10. P. K. Sahu, P. K. Sahu, M. S. Kaurav, M. Messali, S. M. Almutairi, P. L. Sahu and D. D. Agarwal, *ACS Omega*, 2018, **3**, 15035-15042.
11. S. Sadjadi, M. M. Heravi, V. Zadsirjan, S. Y. S. Beheshtiha and R. R. Kelishadi, *ChemistrySelect*, 2018, **3**, 12031-12038.
12. P. K. Sahu, P. K. Sahu, M. S. Kaurav, M. Messali, S. M. Almutairi, P. L. Sahu and D. D. Agarwal, *RSC Adv.*, 2018, **8**, 33952-33959.
13. M. R. Bhosle, D. B. Wahul, G. M. Bondle, A. Sarkate and S. V. Tiwari, *Synth. Commun.*, 2018, **48**, 2046-2060.
14. L. Rout, A. Kumar, P. K. Chand, L. S. K. Achary and P. Dash, *ChemistrySelect*, 2019, **4**, 5696-5706.
15. M. S. Kaurav, P. K. Sahu, P. K. Sahu, M. Messali, S. M. Almutairi, P. L. Sahu and D. D. Agarwal, *RSC Adv.*, 2019, **9**, 3755-3763.
16. J. Puvithra and D. Parthiban, *Asian J. Chem.*, 2020, **32**, 2067-2074.
17. M. M. Heravi, T. Hosseinnejad, M. Tamimi, V. Zadsirjan and M. Mirzaei, *J. Mol. Struct.*, 2020, **1205**, 127598.
18. Y. I. Shaikh, S. S. Shaikh, K. Ahmed, G. M. Nazeruddin and V. S. Shaikh, *Orient. J. Chem.*, 2020, **36**, 415-418.
19. A. K. Bhagi, K. P. Singh, A. Kumar, Priya and N. Manav, *Indian J. Chem.*, 2022, **61**, 1173-1179.
20. Z. Besharati, M. Malmir and M. M. Heravi, *Inorg. Chem. Commun.*, 2022, **143**, 109813.
21. F. Ghobakhloo, D. Azarifar and M. Mohammadi, *J. Phys. Chem. Solids*, 2023, **175**, 111222.
22. P. Ghamari Kargar and G. Bagherzade, *Sci. Rep.*, 2023, **13**, 19104.
